1 Identification of gene products involved in plant colonization by *Pantoea* sp. YR343 using a  
2 diguanylate cyclase expressed in the presence of plants

3

4 Amber N. Bible<sup>a</sup>, Mang Chang<sup>b</sup>, Jennifer L. Morrell-Falvey<sup>a,b#</sup>

5

6 <sup>a</sup>Biosciences Division, Oak Ridge National Laboratory, Oak Ridge TN, USA

7 <sup>b</sup>UT-ORNL Graduate School of Genome Science and Technology, University of Tennessee,

8 Knoxville TN, USA

9

10 Running Head: Characterization of a diguanylate cyclase expressed on plants

11

12 #Address correspondence to

13 Jennifer L. Morrell-Falvey  
14 [Oak Ridge National Laboratory,](#)  
15 [1 Bethel Valley Rd](#)  
16 [Oak Ridge, TN, 37831](#)  
17 [Morrelljl1@ornl.gov](mailto:Morrelljl1@ornl.gov)  
18 [865-241-2841](tel:865-241-2841)

19

20 This manuscript has been authored by UT-Battelle, LLC under Contract No. DE-AC05-  
21 00OR22725 with the U.S. Department of Energy. The United States Government retains and the  
22 publisher, by accepting the article for publication, acknowledges that the United States  
23 Government retains a non-exclusive, paid-up, irrevocable, world-wide license to publish or  
24 reproduce the published form of this manuscript, or allow others to do so, for United States  
25 Government purposes. The Department of Energy will provide public access to these results of  
26 federally sponsored research in accordance with the DOE Public Access Plan  
27 (<http://energy.gov/downloads/doe-public-access-plan>).

28 **Abstract**

29 Microbial colonization of plant roots is a highly complex process that requires the coordination  
30 and regulation of many gene networks, yet the functions of many of these gene products remain  
31 poorly understood. *Pantoea* sp. YR343, a gamma-proteobacterium isolated from the rhizosphere  
32 of *Populus deltoides*, forms robust biofilms along the root surfaces of *Populus* and possesses plant  
33 growth-promoting characteristics. The mechanisms governing biofilm formation along plant roots  
34 by bacteria, including *Pantoea* sp. YR343, are not fully understood and many genes involved in  
35 this process have yet to be discovered. In this work, we identified three diguanylate cyclases in  
36 the plant-associated microbe *Pantoea* sp. YR343 that are expressed in the presence of plant roots,  
37 One of these diguanylate cyclases, DGC2884 localizes to discrete sites in the cells and its  
38 overexpression results in reduced motility and increased EPS production and biofilm formation.  
39 We then performed a genetic screen by expressing this diguanylate cyclase from an inducible  
40 promoter in order to identify candidate downstream effectors of c-di-GMP signaling which may  
41 be involved in root colonization by *Pantoea* sp. YR343. Further, we demonstrate the importance  
42 of other domains in DGC2884 to its activity, which in combination with the genes identified by  
43 transposon mutagenesis, may yield insights into activity and regulation of homologous enzymes  
44 in medically and agriculturally relevant microbes.

45

46

47

48

## 49 **Introduction**

50           The ability of plant growth promoting bacteria to exert beneficial effects on plant hosts is  
51 mediated through chemical and physical associations with plant tissues. Associating with the plant  
52 and surviving within this environment likely requires the coordination of multiple signaling  
53 pathways. For example, chemotaxis signaling pathways are involved in the detection of chemicals  
54 found in plant root exudates (1-4). Moreover, plants are capable of tailoring the composition of  
55 root exudate to promote associations with specific microbes (5). Many bacterial species also use  
56 quorum-sensing as a mechanism in the rhizosphere for influencing changes in gene expression that  
57 can lead to root colonization and biofilm formation (6-9). Indeed, genome analyses showed that  
58 acyl-homoserine lactone (AHL)-based signaling systems are prevalent in the microbiome of  
59 *Populus deltoides* (10). Additionally, plant colonization involves the second messenger signaling  
60 molecule, cyclic diguanylate monophosphate (c-di-GMP), which is known to affect motility,  
61 virulence, exopolysaccharide (EPS) production, and biofilm formation in many bacterial species  
62 (11-15).

63           The levels of c-di-GMP within cells are regulated by two different enzymes: diguanylate  
64 cyclases, which catalyze the production of c-di-GMP from two molecules of guanosine  
65 triphosphate (GTP), and phosphodiesterases, which degrade c-di-GMP to guanosine  
66 monophosphate (GMP) (11-13, 16). Most bacterial genomes encode many diguanylate cyclases  
67 and phosphodiesterases, suggesting that control of c-di-GMP levels is highly regulated.  
68 Production of c-di-GMP by diguanylate cyclases has been shown to modulate a wide variety of  
69 cellular behaviors through different types of effector proteins. For instance, the flagellar brake  
70 protein, YcgR, from *E. coli* and *Salmonella enterica* serovar Typhimurium, can bind c-di-GMP  
71 through a PilZ domain in order to modulate motility (17, 18), while the transcriptional regulator,

72 VpsT, regulates biofilm formation in *V. cholera* in response to c-di-GMP levels (19). Thus far, c-  
73 di-GMP has been shown to bind to proteins containing PilZ or GIL domains (20-22), as well as  
74 riboswitch proteins (23). Furthermore, c-di-GMP has also been shown to bind to the RxxD I-sites  
75 of many diguanylate cyclases and those with degenerate GGDEF domains often serve as effector  
76 proteins (24).

77 Prior studies have shown that diguanylate cyclases can be regulated at either the level of  
78 enzymatic activity or the level of expression, based on conditions within the surrounding  
79 environment (11). Here, we wanted to identify diguanylate cyclases that were regulated at the  
80 expression level in response to the presence of a plant in the rhizosphere using *Pantoea* sp. YR343.  
81 *Pantoea* sp. YR343 was isolated from the rhizosphere of *Populus deltoides* and has been shown  
82 to associate with a variety of plant hosts, including *Populus deltoides*, *Populus trichocarpa*,  
83 *Triticum aestivum*, and *Arabidopsis thaliana* (25, 26). *Pantoea* sp. YR343 is a gamma-  
84 proteobacterium from the *Enterobacteriaceae* family which produces indole-3-acetic acid (IAA)  
85 (27, 28) and solubilizes phosphate, both of which have been shown to contribute to plant growth  
86 (6). Furthermore, *Pantoea* sp. YR343 has been shown to form biofilms along the surface of plant  
87 roots (25). Because c-di-GMP plays an important role in biofilm formation, we hypothesized that  
88 there may be diguanylate cyclases that are specifically expressed in response to growth in the  
89 presence of a plant root in the rhizosphere. To this end, we identified three diguanylate cyclases  
90 that are expressed during colonization of plant roots. Overexpression of one of these diguanylate  
91 cyclases (encoded by PMI39\_02884 and hereby referred to as DGC2884) significantly impacted  
92 EPS production, motility, and biofilm formation. This overexpression strain was utilized for a  
93 genetic screen to identify candidate genes that affect the ability of *Pantoea* sp. YR343 to regulate  
94 EPS production in the presence of high levels of c-di-GMP, which we hypothesized would have

95 defects in biofilm formation and root colonization. Transposon mutants affecting several of these  
96 genes were further characterized for their ability to colonize plant roots.

97

## 98 **Results**

### 99 **Diguanylate cyclase promoter analysis**

100 The genome of *Pantoea* sp. YR343 contains 13 genes predicted to encode proteins with  
101 diguanylate cyclase domains, 8 genes predicted to encode phosphodiesterase domains, 8 genes  
102 predicted to encode proteins possessing both diguanylate cyclase and phosphodiesterase domains,  
103 and 3 genes predicted to encode proteins with PilZ-domains (<https://img.jgi.doe.gov>). Table 1 lists  
104 each of the diguanylate cyclases found in *Pantoea* sp. YR343, along with its domain organization  
105 based on Pfam analyses (29). Notably, 13 of the 21 predicted diguanylate cyclases lack a canonical  
106 RxxD I-site (Table 1). We hypothesized that of the 21 predicted diguanylate cyclases, there were  
107 likely some enzymes that were expressed in response to the presence of a plant in the rhizosphere.  
108 In order to identify candidate enzymes, we began by generating promoter-reporter constructs for  
109 each of the 21 genes encoding diguanylate cyclase domains by fusing each promoter to the gene  
110 encoding green fluorescent protein (GFP) using a pPROBE-NT vector (30). Putative gene  
111 promoters for each enzyme were predicted using BPROM (31). We were able to successfully  
112 produce these promoter fusion constructs for 20 of the 21 diguanylate cyclases (Table 1). After  
113 transforming these constructs into wild type *Pantoea* sp. YR343, the reporter strains were grown  
114 under different conditions to determine under which growth conditions the promoters were active,  
115 compared to a control strain carrying an empty pPROBE-NT vector. We measured the average  
116 fluorescence intensity of cells grown under various growth conditions, and then normalized  
117 fluorescence intensity values against the empty vector control strain set to a value of 1.00. When

118 cells were grown in M9 minimal media with 0.4% glucose, we found that twelve diguanylate  
119 cyclase reporters showed an average fluorescence intensity below 2.00 (weak or no expression),  
120 making them suitable candidates for further study in terms of expression in biofilms, pellicles, and  
121 during root colonization (Table 1). To test for expression during biofilm formation, the cells were  
122 grown statically in M9 minimal medium with 0.4% glucose for 72 hours in 12-well dishes  
123 containing a vinyl coverslip as described in Materials and Methods. These data show that eleven  
124 diguanylate cyclases showed increased expression under these conditions, with DGC2884 and  
125 DGC2242 showing the highest levels (Table 1 and Fig 1). Interestingly, we found that each of the  
126 strains showed an increase in expression during biofilm formation based on GFP fluorescence, but  
127 images showed that GFP levels driven from the DGC2884 promoter were not uniform within the  
128 biofilm (Fig 1). Instead, we found that GFP was highly expressed in specific patches throughout  
129 the biofilm, but expressed at low or undetectable levels in other regions. This expression pattern  
130 was also observed in some of the other promoter constructs and is reflected, in part, by the higher  
131 S.E.M. values shown in Table 1. We also tested for expression during pellicle formation and found  
132 that most strains only exhibited a modest increase in expression (Table 1).

133 Next, we tested the activity of these 12 promoters during root colonization of *T. aestivum* and *P.*  
134 *trichocarpa*. Bacteria associated with roots were examined for the presence or absence of  
135 fluorescence, since quantification of expression levels was difficult due to plant autofluorescence  
136 (Table 1). After one week of growth post-inoculation, we found that DGC2884, DGC3006, and  
137 DGC3134 were expressed on *T. aestivum* and *P. trichocarpa* roots (Fig 1 and Table 1). We cannot  
138 exclude the possibility that the eight untested diguanylate cyclases may also be expressed during  
139 plant association since their high levels of background fluorescence during growth in liquid culture  
140 precluded testing them directly on plants. For the purpose of this study, however, we chose to

141 focus on one of the three enzymes that were expressed during root colonization which was  
142 DGC2884.

143  
144 Figure 1. Promoter-GFP reporter assays for DGC2884 expression under different growth  
145 conditions: biofilms on vinyl coverslips, *T. aestivum* root colonization and *P. trichocarpa* root  
146 colonization. Scale bars represent 1 mm in biofilm image, while scale bars in root colonization  
147 images are labeled accordingly. Arrows indicate bacterial colonization along the surface of plant  
148 roots. Data is representative of a minimum of three independent experiments.

149

150 TABLE 1. Promoter activity under various growth conditions

| 151<br>152 | DGC <sup>1</sup> | Gene Locus Tag | Domain architecture <sup>2</sup>            | liquid culture  | biofilm            | pellicle    | root<br>colonization |
|------------|------------------|----------------|---------------------------------------------|-----------------|--------------------|-------------|----------------------|
|            | pPROBE           | control        |                                             | 1.00            | 1.00               | 1.00        | -                    |
|            | DGC2884          | PMI39_02884    | CHASE8-GGDEF                                | 1.16 ± 0.18     | 1841.20 ± 938.14   | 1.28 ± 0.17 | +                    |
|            | DGC3006          | PMI39_03006    | PAS3-GGDEF                                  | 1.05 ± 0.11     | 105.44 ± 18.06     | 1.08 ± 0.18 | +                    |
|            | DGC3134          | PMI39_03134    | MASE5-GGEEF                                 | 0.75 ± 0.08     | 11.76 ± 3.16       | 1.19 ± 0.44 | +                    |
|            | DGC0751          | PMI39_00751    | dCache_1-GGEEF<br>(RxxD)                    | 0.95 ± 0.12     | 0.90 ± 0.43        | 1.03 ± 0.16 | -                    |
|            | DGC0995          | PMI39_00995    | GGEEF                                       | 0.95 ± 0.02     | 5.09 ± 2.37        | 0.90 ± 0.09 | -                    |
|            | DGC1023          | PMI39_01023    | MHYT-MHYT-<br>MHYT-GGDEF-EAL                | 1.62 ± 0.03     | 217.99 ± 35.02     | 1.21 ± 0.18 | -                    |
|            | DGC1024          | PMI39_01024    | MHYT-MHYT-<br>MHYT-GGDEF-EAL                | 0.78 ± 0.02     | 67.83 ± 28.19      | 0.98 ± 0.05 | -                    |
|            | DGC2242          | PMI39_02242    | CHASE4-GGDEF-<br>EAL<br>(RxxD)              | 0.87 ± 0.11     | 1318.75 ± 112.66   | 0.93 ± 0.10 | -                    |
|            | DGC3247          | PMI39_03247    | GGEEF<br>(RxxD)                             | 0.94 ± 0.03     | 24.94 ± 8.30       | 0.95 ± 0.13 | -                    |
|            | DGC3482          | PMI39_03482    | GAF-GGDEF<br>(RxxD)                         | 0.94 ± 0.02     | 38.13 ± 9.60       | 1.20 ± 0.14 | -                    |
|            | DGC3621          | PMI39_03621    | dCache_1-GGEEF<br>(RxxD)                    | 1.27 ± 0.01     | 22.88 ± 14.83      | 1.42 ± 0.12 | -                    |
|            | DGC0366          | PMI39_00366    | GAPES4-FRSDF-ELL                            | 5.09 ± 0.69     | N. D. <sup>3</sup> | N. D.       | N. D.                |
|            | DGC1008          | PMI39_01008    | PAS9-PAS9-PAS9-<br>PAS4-GGDEF-EAL<br>(RxxD) | 4.35 ± 0.11     | N. D.              | N. D.       | N. D.                |
|            | DGC1089          | PMI39_01089    | GGEEF                                       | 4.31 ± 0.11     | N. D.              | N. D.       | N. D.                |
|            | DGC1854          | PMI39_01854    | MASE1-PAS3-PAS3-<br>PAS-GGDEF (RxxD)        | 20.95 ± 0.76    | N. D.              | N. D.       | N. D.                |
|            | DGC2196          | PMI39_02196    | CHASE7-GGEEF<br>(RxxD)                      | 5.33 ± 0.03     | N. D.              | N. D.       | N. D.                |
|            | DGC2334          | PMI39_02334    | GAPES4-GPSDF-<br>EAL                        | NA <sup>4</sup> | N. D.              | N. D.       | N. D.                |
|            | DGC2465          | PMI39_02465    | CHASE4-PAS-<br>GGDAF-EAL                    | 2.00 ± 0.03     | N. D.              | N. D.       | N. D.                |
|            | DGC2697          | PMI39_02697    | PAS9-GGDEF-EAL                              | 16.73 ± 0.27    | N. D.              | N. D.       | N. D.                |

|         |             |             |              |       |       |       |
|---------|-------------|-------------|--------------|-------|-------|-------|
| DGC3217 | PMI39_03217 | GGEEF       | 12.77 ± 0.81 | N. D. | N. D. | N. D. |
| DGC4070 | PMI39_04070 | MASE2-GGDEL | 7.76 ± 0.18  | N. D. | N. D. | N. D. |

153  
154  
155  
156  
157  
158  
159  
160  
161

Promoter assay performed using pPROBE vector cloned into *Pantoea* sp. YR343 and grown under different conditions. Values for average fluorescence (along with the standard deviation) are reported here. See Materials and Methods for details.

<sup>1</sup>Diguanylate cyclase gene for which the promoter was assayed for activity.

<sup>2</sup>Domain architecture and nomenclature is based on sequence analysis using the Pfam database. (RxxD) indicates that this enzyme possesses a RxxD site.

<sup>3</sup>N. D., not determined

<sup>4</sup>NA, not available

<sup>5</sup>Fluorescence was described in qualitative terms, where "+" indicates observed fluorescence and "-" indicates no observed fluorescence.

162

## 163 **Characterization of DGC2884 and mutant variants in biofilm formation, Congo Red** 164 **binding, and motility**

165 The domain architecture of DGC2884 lacks a RxxD I-site, and the N-terminal CHASE8 domain  
166 of DGC2884 consists of a transmembrane domain and a HAMP (Histidine kinase, Adenylate  
167 cyclase, Methyl-accepting protein, and Phosphatase) domain (Table 1). In the absence of an I-site,  
168 the two glycine residues in the GGDEF domain are essential for binding of c-di-GMP (32).  
169 Interestingly, this domain architecture is not altogether unusual and has been studied in other  
170 enzymes. The best studied diguanylate cyclases with these domains are YfiN (or TpbB) from  
171 *Pseudomonas aeruginosa*, *Salmonella enterica*, and *Escherichia coli* (also called DgcN) (17, 33-  
172 35). These enzymes have been shown to primarily regulate motility via YcgR and production of  
173 exopolysaccharides (such as Pel and Psl in *P. aeruginosa*), in addition to roles in cell division (17,  
174 33-35). Among these examples, DgcN from *E. coli* is the only example to lack a RxxD I-site, like  
175 DGC2884 from *Pantoea* sp. YR343. Interestingly, multiple sequence alignments using protein  
176 sequences in Clustal Omega show a 33% sequence identity to TpbB from *P. aeruginosa* and 37%  
177 sequence identity to DgcN from *E. coli* (Fig S1) (36). Furthermore, YfiN in *P. aeruginosa* and *E.*  
178 *coli* is found within the YfiBNR operon, which consists of the outer membrane lipoprotein YfiB,  
179 which stimulates YfiN, and the soluble periplasmic protein YfiR, which represses the activity of  
180 YfiN (33, 34). Interestingly, DGC2884 is located within an operon that resembles the YfiBNR



181 operon, suggesting that DGC2884 may have a similar function to YfiN. In recent work, it has  
182 been suggested that in the absence of a RxxD I-site, the transmembrane and HAMP domains work  
183 to dimerize the diguanylate cyclase and allow it to bind to two c-di-GMP molecules (32). We  
184 therefore hypothesized that loss of the N-terminal transmembrane domain is critical to the function  
185 of DGC2884 in *Pantoea* sp. YR343.

186 To further characterize the diguanylate cyclase DGC2884 from *Pantoea* sp. YR343, we  
187 generated constructs with the full length DGC2884, an enzyme-dead DGC2884 AADEF mutant,  
188 and a DGC2884 $\Delta$ TM mutant and overexpressed each of these in a wild type *Pantoea* sp. YR343  
189 background. Construction and characterization of DGC2884 with the GGDEF motif mutated to  
190 AADEF, which has been shown to render diguanylate cyclases enzymatically inactive (32, 37-41),  
191 was used to further support that enzyme activity of this enzyme was responsible for any observed  
192 phenotypes. We next examined how expression of DGC2884 and its variants affected colony  
193 morphology, Congo Red binding, biofilm formation, and motility in comparison to a control strain  
194 carrying an empty vector (Fig 2). Growth curves were compared in both minimal and rich media  
195 (Fig S2). Notably, expression of wild type DGC2884, but not any of the variants, resulted in  
196 formation of small aggregates, likely skewing the measurements of optical density (data not  
197 shown). In prior work, we found that *Pantoea* sp. YR343 exhibits drier colony morphology on  
198 LB media and a more mucoid phenotype on R2A media (25); therefore, we first examined growth  
199 of these strains on each media type containing Congo Red, a dye specific to  $\beta$ -linked glucans and  
200 curli fibers (42). These results show that *Pantoea* sp. YR343 cells overexpressing DGC2884  
201 (YR343 (pSRK (Km)-DGC2884)) resulted in red, wrinkly colony formation (Fig 2A). In contrast,  
202 overexpression of the AADEF variant (YR343 (pSRK (Km)-DGC2884 AADEF)) resulted in a  
203 colony phenotype more similar to the empty vector control, with the exception of wrinkles,

204 suggesting that expression of DGC2884 in the absence of enzymatic activity may still retain some  
205 function (Fig 2A). We observed that Congo Red binding by strains expressing the DGC2884 $\Delta$ TM  
206 variant was less than that of the DGC2884 expressing strain and we no longer observed wrinkly  
207 colony morphology, supporting the hypothesis that the TM domain of DGC2884 is critical to its  
208 function (Fig 2A).

209

210 Figure 2. Characterization of individual diguanylate cyclases expressed in a wild type *Pantoea*  
211 sp. YR343 background. (A) Indicated strains were spotted on either LB or R2A media containing  
212 Congo Red for 48 hours prior to imaging. Each plate consisted of three replicates and experiments  
213 were repeated at least three times. (B) Swim agar plates were inoculated in the center of each  
214 plate and incubated for 24 hours prior to imaging. Average swimming ring diameter was  
215 determined from three individual experiments consisting of three biological replicates each. (\*)  
216 indicate statistically significant differences ( $p \leq 0.005$ ) compared to the wild type strain and (a)  
217 represents statistically significant differences ( $p \leq 0.005$ ) compared to the strain expressing  
218 DGC2884, both of which were measured by the student's t-test. (C) Indicated strains were grown  
219 under conditions conducive to biofilm formation on vinyl coverslips for 72 hours prior to staining  
220 with Crystal Violet. Average absorbance values at 550 nm for each sample are shown in graph.  
221 Data is representative of at least three independent experiments consisting of at least 3 biological  
222 replicates per sample each time. (\*) indicate statistically significant differences ( $p < 0.005$ ) as  
223 measured by the student's t-test. (a) represents a statistically significant difference ( $p < 0.005$ )  
224 when compared to expression of DGC2884 as measured by the student's t-test. (D) Pellicle  
225 formation assays were used to compare the percentages of cells in pellicles for each sample after  
226 a period of 72 hours. Each bar represents three biological replicates from a single experiment.

227 Experiment was performed twice with similar results. (\*) indicate statistically significant  
228 differences ( $p < 0.005$ ) compared to the wild type strain and (a) represents a statistically significant  
229 difference ( $p < 0.05$ ) compared to the strain expressing DGC2884, both of which were measured  
230 by the student's t-test. (E) Fluorescence micrographs of representative cells co-expressing the Vc2  
231 Spinach aptamer with the indicated constructs. Scale bar represents 5  $\mu\text{m}$ . (F) Diguanylate  
232 cyclase enzyme activity is shown as a bar graph comparing the mean fluorescence intensity  
233 measured across 50 cells per sample. Error bars represent the S.E.M. values. (\*) indicate  
234 statistically significant differences ( $p < 0.005$ ) as measured by the student's t-test. Data shown  
235 represents three separate experiments.

236

237         Since increased levels of c-di-GMP are typically associated with decreased motility (11,  
238 43, 44), we next tested whether overexpression of these diguanylate cyclases affected motility  
239 using a swim plate agar assay. As expected, overexpression of DGC2884 resulted in impaired  
240 motility compared to the control strain, which was partially restored in the DGC2884 AADEF  
241 variant (Fig 2B). We found that, in comparison to strains overexpressing DGC2884, expression  
242 of DGC2884 $\Delta\text{TM}$  resulted in partial restoration of motility behavior reminiscent of that observed  
243 for strains expressing the DGC2884 AADEF mutant (Fig 2B). Together, these data suggest that a  
244 fully functional DGC2884 is required to modulate motility.

245         Next, we examined whether overexpression of these diguanylate cyclases influenced  
246 biofilm formation (Fig 2C). While each of these strains showed formation of biofilms on vinyl  
247 coverslips, the most robust biofilms were formed during expression of the wild type DGC2884,  
248 which was reduced in the DGC2884 AADEF and DGC2884 $\Delta\text{TM}$  mutants (Fig 2C), further

249 indicating the importance of both an active enzymatic site and the N-terminal transmembrane  
250 domain.

251 We also tested the effect of overexpression of each diguanylate cyclase on pellicle  
252 formation and calculated the percentage of cells in pellicles and found that overexpression of  
253 DGC2884 resulted in significantly increased pellicle formation when compared to the empty  
254 vector control ( $p < 0.005$ , t-test) (Fig 2D). While expression of DGC2884 AADEF and  
255 DGC2884 $\Delta$ TM also resulted in more pellicle formation than the control (significantly more by  
256 DGC2884 $\Delta$ TM,  $p < 0.05$ , t-test), they produced significantly less pellicle than that of wild type  
257 cells expressing the full-length DGC2884 ( $p < 0.05$ , t-test) (Fig 2D).

258 Lastly, we assessed the enzyme activity of each diguanylate cyclase, including the  
259 DGC2884 AADEF mutant, using a Vc2-Spinach aptamer which acts as a c-di-GMP biosensor  
260 (45). For this assay, the full length DGC2884 diguanylate cyclase and each of the variants were  
261 expressed in *E. coli* BL21 DE3 Star cells and the fluorescence intensity of cells was measured as  
262 an indicator of c-di-GMP levels (Fig 2E, 2F). Indeed, we found that cells expressing DGC2884  
263 had significantly higher fluorescence intensity compared to control cells, consistent with  
264 DGC2884 being an active diguanylate cyclase. Furthermore, cells expressing the DGC2884  
265 AADEF variant were significantly less fluorescent than cells expressing DGC2884, suggesting  
266 that the AADEF mutation indeed affected enzyme activity (Fig 2E, 2F). We also found that  
267 expressing DGC2884 $\Delta$ TM resulted in little to no activity (Fig 2E, 2F). To verify that the genes  
268 encoding these diguanylate cyclases were expressed in these cells, we examined transcript levels  
269 using RT-PCR (Fig S3). Taken together, results from each of these assays confirm that both  
270 enzyme activity and the N-terminal transmembrane are critical to the function of DGC2884.

271 **Domain architecture and role of transmembrane domain in localization pattern of DGC2884**

272 To gain further insight into the function of DGC2884, we performed a simple Protter  
273 analysis using the amino acid sequence of DGC2884 (46) and found that the sequence for  
274 DGC2884 is predicted to have two transmembrane domains at its N-terminus that make up a  
275 CHASE8 domain, followed by the GGDEF domain (Fig 3A). The presence of CHASE domains  
276 within various proteins, including diguanylate cyclases, have been described as having different  
277 sensory capacities (47-50), though precisely what these domains sense is still unknown.

278  
279 Figure 3. Localization of wild type DGC2884 and DGC2884 $\Delta$ TM expressed in a wild type  
280 background using immunofluorescence assays. (A) Predicted topological structure of DGC2884  
281 using Protter (top) and domain organization based on pfam analysis (bottom). (B) HA- tagged  
282 DGC2884 and Myc-tagged DGC2884 $\Delta$ TM were detected using immunofluorescence assays and  
283 imaged using confocal microscopy. Individual cells are outlined in a white dashed line. Scale  
284 bars represent 1  $\mu$ m. (C) Motility plate assays demonstrating functionality of tagged constructs,  
285 including an *ipdC* negative control. Data represent three biological replicates and at least two  
286 independent experiments. (\*) indicate statistically significant differences ( $p < 0.05$ ) as measured  
287 by the student's t-test.

288  
289 We next examined localization of wild type DGC2884 and DGC2884 $\Delta$ TM in a wild type  
290 background by expressing it fused to either a 3HA or 13Myc tag (Fig 3B). These data show that  
291 DGC2884 was found to primarily localize in discrete foci at the cell pole or towards the mid-cell.  
292 In the absence of the N-terminal transmembrane domain, however, DGC2884 no longer localized  
293 as discrete foci, but rather the localization pattern became more diffuse with fewer visible foci (Fig  
294 3B and Table 2). To verify that the tag did not alter the expression or function of these enzymes,

295 we performed a motility assay (Fig 3C) and western blot (Fig S5) and observed that each construct  
296 was expressed and functional. As a control, we used a *Pantoea* YR343 strain carrying the same  
297 plasmid with *ipdC* inserted in place of the diguanylate cyclase gene where we do not expect to see  
298 any phenotypes associated with motility (27).

299

300 TABLE 2. Quantification of GFP localization for tagged diguanylate cyclases.

| DGC     | total cells (n) | Cells with indicated number of foci (%) |    |    |    |   |    |
|---------|-----------------|-----------------------------------------|----|----|----|---|----|
|         |                 | diffuse/no foci                         | 1  | 2  | 3  | 4 | 5  |
| 2884    | 55              | 0                                       | 42 | 33 | 16 | 9 | 0  |
| 2884ΔTM | 101             | 55                                      | 20 | 13 | 2  | 0 | 11 |

301 Images from Figure 3 were analyzed with Fiji ImageJ software to assess localization of indicated proteins. Foci were counted per cell and  
302 populations consisting of different localization patterns were placed into the indicated categories and population percentages were reported.  
303

304

### 305 Identification of c-di-GMP responsive genes using transposon mutagenesis

306 Overexpression of DGC2884 resulted in a number of phenotypes (shown in Fig 2),  
307 including wrinkly colonies, increased Congo Red binding, increased pellicle and biofilm  
308 formation, and decreased motility, all of which suggest that DGC2884 is an active enzyme that  
309 influences c-di-GMP levels. Because expression of this diguanylate cyclase is influenced by plant  
310 association, we wanted to examine the molecular basis for the observed effects of DGC2884  
311 expression on *Pantoea* behavior. To this end, we designed a transposon mutant screen to identify  
312 mutants that failed to respond to high levels of cyclic di-GMP resulting from DGC2884  
313 overexpression, as determined by differences in Congo Red binding from that of the wild type  
314 strain expressing DGC2884. For this screen, we constructed a small transposon mutant library in  
315 *Pantoea* sp. YR343 (pSRK (Gm) –*DGC2884*) and screened for mutants of interest by plating the  
316 library on R2A plates containing Congo Red. Colonies that did not display the typical DGC2884  
317 overexpression phenotype of wrinkled colonies and/or increased Congo Red binding were selected

318 for further analyses. From this screen, we isolated 136 mutants that failed to respond to DGC2884  
 319 overexpression. Using a rescue cloning approach, we identified the location of the transposon  
 320 insertion in each of these mutants, which resulted in a list of 61 genes, with some genes represented  
 321 by multiple transposon mutants (Table 3). The top 5 COG categories represented among this set  
 322 of genes include transcription (K), signal transduction (T), cell wall/membrane/envelope  
 323 biogenesis (M), carbohydrate transport and metabolism (G), and intracellular  
 324 trafficking/secretion/vesicular transport (U). We also identified 14 genes that were classified as  
 325 either hypothetical proteins or that were not in a COG category.

326

327 TABLE 3. List of genes identified by transposon mutagenesis.

| Locus tag   | Gene Product Name                          | COG Category | Number of hits |
|-------------|--------------------------------------------|--------------|----------------|
| PMI39_00157 | integrase                                  | L            | 1              |
| PMI39_00241 | hypothetical protein wp_008101727          |              | 1              |
| PMI39_00454 | alpha/beta hydrolase                       | R            | 1              |
| PMI39_00487 | AMP-binding protein                        | I            | 1              |
| PMI39_00509 | transcriptional regulator                  | K            | 3              |
| PMI39_00617 | succinate-semialdehyde dehydrogenase       | C            | 1              |
| PMI39_00716 | ligand-gated channel protein               | P            | 1              |
| PMI39_00827 | diguanylate phosphodiesterase              | T            | 1              |
| PMI39_00954 | hypothetical protein                       |              | 1              |
| PMI39_00979 | acetylornithine aminotransferase           | E            | 1              |
| PMI39_01013 | Response regulator                         | K T          | 1              |
| PMI39_01243 | hypothetical protein                       |              | 2              |
| PMI39_01268 | DEAD/DEAH box helicase                     | V            | 1              |
| PMI39_01302 | hypothetical protein                       |              | 1              |
| PMI39_01645 | short-chain dehydrogenase                  | I Q R        | 1              |
| PMI39_01786 | histidine kinase                           | T            | 1              |
| PMI39_01848 | UDP-phosphate galactose phosphotransferase | M            | 1              |
| PMI39_01849 | membrane protein TerC                      | P            | 1              |
| PMI39_01865 | lipid kinase                               | R I          | 3              |
| PMI39_01945 | hypothetical protein                       |              | 1              |
| PMI39_01946 | hypothetical protein                       |              | 1              |
| PMI39_01962 | acetylornithine aminotransferase           | V            | 1              |

|             |                                                                                         |     |    |
|-------------|-----------------------------------------------------------------------------------------|-----|----|
| PMI39_01991 | transcriptional regulator                                                               | K   | 1  |
| PMI39_02071 | xylose ABC transporter substrate-binding protein                                        | G   | 5  |
| PMI39_02188 | flagellar biosynthesis protein FliR                                                     | N U | 47 |
| PMI39_02189 | Response regulator containing a CheY-like receiver domain and an HTH DNA-binding domain | K T | 4  |
| PMI39_02190 | methyl-accepting chemotaxis protein                                                     | N T | 1  |
| PMI39_02310 | integrase                                                                               | L   | 1  |
| PMI39_02350 | UDP-N-acetyl-D-mannosamine dehydrogenase                                                | M   | 1  |
| PMI39_02416 | bilin biosynthesis protein CpeZ                                                         | K   | 1  |
| PMI39_02667 | peptide ABC transporter substrate-binding protein                                       | E   | 1  |
| PMI39_02700 | L-ribulose-5-phosphate 4-epimerase                                                      | G   | 1  |
| PMI39_02775 | membrane protein                                                                        | S   | 1  |
| PMI39_02840 | 2-methylcitrate hydratase                                                               |     | 1  |
| PMI39_03014 | dienelactone hydrolase                                                                  | Q   | 1  |
| PMI39_03048 | endonuclease                                                                            | L   | 1  |
| PMI39_03059 | Capsule polysaccharide transporter                                                      | M   | 1  |
| PMI39_03065 | hypothetical protein                                                                    |     | 3  |
| PMI39_03156 | Protein of unknown function (DUF3274)                                                   |     | 1  |
| PMI39_03162 | type VI secretion protein ImpG                                                          |     | 1  |
| PMI39_03169 | glyceraldehyde-3-phosphate dehydrogenase                                                | G   | 1  |
| PMI39_03186 | hypothetical protein wp_008107569                                                       |     | 2  |
| PMI39_03244 | nitrate reductase                                                                       | C   | 1  |
| PMI39_03380 | channel protein TolC                                                                    | M U | 1  |
| PMI39_03579 | nucleoside-diphosphate kinase                                                           | F   | 2  |
| PMI39_03698 | deoxyguanosinetriphosphate triphosphohydrolase                                          | F   | 2  |
| PMI39_04079 | hypothetical protein                                                                    |     | 1  |
| PMI39_04218 | urea ABC transporter                                                                    | E   | 1  |
| PMI39_04305 | signal transduction histidine kinase                                                    | T   | 3  |
| PMI39_04393 | glycerol uptake facilitator GlpF                                                        | G   | 2  |
| PMI39_04394 | glycerol uptake facilitator GlpF                                                        | C   | 1  |
| PMI39_04442 | hypothetical protein                                                                    |     | 1  |
| PMI39_04512 | cell division protein FtsY                                                              | U   | 1  |
| PMI39_04570 | transposase                                                                             |     | 1  |
| PMI39_04700 | Outer membrane autotransporter barrel domain-containing protein                         | M U | 2  |
| PMI39_04978 | ABC transporter ATP-binding protein                                                     | P   | 5  |
| PMI39_04984 | hypothetical protein                                                                    | D   | 1  |

328

329

330



### 331 Behavioral defects observed in selected mutants

332 Using the list of genes found in the genetic screen (Table 3), we selected eight different  
333 transposon mutants for further analyses, including a predicted UDP-galactose lipid carrier  
334 transferase (PMI39\_01848; UDP::Tn5) and a predicted capsule polysaccharide transporter  
335 (PMI39\_03059; CAP::Tn5), both of which have a predicted role in exopolysaccharide production.  
336 Because approximately one third of the identified transposon mutants were affected in *fliR*  
337 (PMI39\_02188; FliR::Tn5), we included this mutant for further characterization as well. We also  
338 chose mutants predicted to be affected in Type VI secretion (PMI39\_03162; Type VI::Tn5), in  
339 glycerol uptake (PMI39\_04394; GlpF::Tn5), transport (PMI39\_04218; ABC::Tn5), a nucleoside-  
340 diphosphate kinase (PMI39\_03579; Ndk::Tn5), and one of the three hypothetical proteins  
341 (PMI39\_03065; Hypo::Tn5). We began by curing each mutant of the DGC2884 expression  
342 plasmid (pSRK(gm)-*DGC2884*) in order to introduce an empty pSRK(gm) vector control prior to  
343 examining EPS production (by observing phenotypes on media with Congo Red) (Fig 4A, 4B).  
344 Next, we used the cured transposon mutants to observe pellicle formation (Fig 4C), and measure  
345 biofilm production with a crystal violet assay (Fig 4D). Compared to the wild type control, each  
346 mutant had a different growth phenotype on media with Congo Red, some of which were more  
347 noticeable on one media type over the other (Fig 4A, 4B). These phenotypes were further  
348 influenced based on whether the mutant expressed DGC2884 (pSRK (gm)-*DGC2884*) or an empty  
349 vector (pSRK (gm)). We next examined the effects of these mutations on pellicle formation and  
350 found that the UDP::Tn5, FliR::Tn5, and GlpF::Tn5 mutants produced significantly less pellicle  
351 than the wild type strain (Fig 4C). We also examined biofilms attached to vinyl coverslips and  
352 found that while some mutants appear to produce more biofilm, such as FliR::Tn5 and GlpF::Tn5,  
353 there were no statistically significant differences measured by quantifying Crystal Violet staining.

354 Interestingly, we did find that the UDP::Tn5 and Ndk::Tn5 mutants produced significantly more  
355 biofilm than the wild type strain in this assay (Fig 4C).

356

357 Figure 4. Characterization of behavioral defects among selected transposon mutants: UDP::Tn5  
358 (PMI39\_01848), CAP::Tn5 (PMI39\_03059), FliR::Tn5 (PMI39\_02188), TypeVI::Tn5  
359 (PMI39\_03162), GlpF::Tn5 (PMI39\_04394), ABC::Tn5 (PMI39\_04218), Ndk::Tn5  
360 (PMI39\_03579), and Hypo::Tn5 (PMI39\_03065). Individual strains possessing either an empty  
361 pSRK-gm vector or pSRK(gm)-DGC2884 were spotted onto R2A (A) or LB (B) plates with Congo  
362 Red and incubated for 48 hours prior to imaging. (C) Each strain was grown under conditions  
363 conducive to pellicle formation for 72 hours. Graph indicates the average percentage of cells  
364 within the pellicles taken from three biological replicates. (\*) indicate statistically significant  
365 differences ( $p < 0.005$ ) when compared to the wild type strain using the student's t-test. (D)  
366 Biofilm assays were performed using vinyl coverslips for 72 hours prior to staining with crystal  
367 violet. Bar graphs describe the average absorbance at 595 nm per sample as determined from two  
368 experiments, each with a set of three biological replicates. (\*) indicates statistically significant  
369 differences ( $p < 0.005$ ) when compared to the wild type strain using the student's t-test.

370

371 While there were a variety of interesting behaviors observed for individual mutants in  
372 formation of biofilms and pellicles, these behaviors do not necessarily reflect what takes place in  
373 the rhizosphere during root colonization. We therefore chose to further characterize each of these  
374 mutants in colonization of *Populus* plant roots. For these studies, we examined colonization  
375 behavior of each mutant individually, and found that the UDP::Tn5 mutant showed significantly  
376 reduced colonization compared to the wild type strain, while the Type VI::Tn5, ABC::Tn5, and

377 Ndk::Tn5 mutants showed a slight, though significant, increase in colonization (Fig 5A;  
378 statistically significant differences with  $p < 0.005$ , t-test). Comparisons of growth rates between  
379 transposon mutants and the wild type strain showed no significant differences for most strains,  
380 except for growth with UDP::Tn5 (Fig S4); however, based on growth curves, the maximum OD  
381 reached by wild type cells is approximately 0.67 (corresponding to a cell count of  $5.36 \times 10^8$  cells  
382 per mL), while the maximum OD for the UDP::Tn5 mutant is approximately 0.57 (corresponding  
383 to a cell count of  $4.56 \times 10^8$  cells per mL) which may contribute, in part, to the observed two orders  
384 of magnitude reduction in colonization.

385

386 Figure 5. Effects of transposon mutations on root colonization patterns in *P. trichocarpa*. (A)  
387 Colonization of plant roots inoculated with wild type *Pantoea* YR343, UDP::Tn5, CAP::Tn5,  
388 FliR::Tn5, Type VI::Tn5, GlpF::Tn5, ABC::Tn5, Ndk::Tn5, or Hypo::Tn5 mutants and was  
389 measured after 3 weeks by counting CFUs relative to the total weight of each plant root. Error  
390 bars represent standard deviation over three to five different biological replicates per sample and  
391 (\*) represent statistically significant differences ( $p \leq 0.005$ , t-test). (B) Images of *P. trichocarpa*  
392 (red) one week after inoculation with the indicated bacterial strains (green). Scale bar represents  
393 10  $\mu\text{m}$ .

394

395 In addition to counting the overall number of microbes, we also wanted to determine how  
396 these mutant strains were distributed during colonization compared to wild type. For our studies,  
397 the wild type strain, the UDP::Tn5, and CAP::Tn5 mutant were each tagged with green fluorescent  
398 protein to facilitate imaging. The remaining mutants were observed by staining with Syto 9 dye  
399 (Fig 5B). In recent work by Noirot-Gros *et al.* (51), several patterns of root surface colonization

400 in Aspen were described to facilitate comparisons, including no pattern (NP), long strips (LS),  
401 long patch microcolonies (LP), short patch microcolonies (SP), and high density bacterial coating  
402 (C). Using these descriptions, we observed that wild type *Pantoea* sp. YR343 exhibited a  
403 combination of long strips, long patch microcolonies, and small patches and was localized along  
404 the main root and root hair regions (Fig 5B). Consistent with its reduced counts, it was difficult  
405 to detect the UDP::Tn5 mutant on the root surface, although some small patches along the primary  
406 root surface were observed. The colonization pattern of CAP::Tn5 was very different from wild  
407 type, even though the overall level of colonization was similar (Fig 5B). Interestingly, the  
408 CAP::Tn5 mutant did not display a pattern of any kind, but was spread out over the root surface  
409 as individual cells and did not form patches like the wild type strain, possibly indicating a role of  
410 EPS in modulating the physical patterns of colonization along plant roots. Colonization by the  
411 FliR::Tn5, Type VI::Tn5, ABC::Tn5, and Hypo::Tn5 mutants consisted of long strips and small  
412 patches of cells and were found predominantly along the root hairs (Fig 5B). Both the Ndk::Tn5  
413 and GlpF::Tn5 mutants exhibited primarily small patches of cells which appeared to be quite  
414 spread out along the main root, but near root hair regions (Fig 5B). Among these transposon  
415 mutants, the strains with the most noticeable differences in colonization patterns were CAP::Tn5,  
416 Ndk::Tn5, and GlpF::Tn5.

## 417 **Discussion**

418 We describe here the identification of three diguanylate cyclases that were expressed  
419 consistently during colonization of plant roots. Although we only identified three diguanylate  
420 cyclase genes (out of 21 predicted genes) that are expressed in the presence of plants, it is possible  
421 that the nature of this assay may have excluded other potential genes of interest. For example,  
422 predicted promoter sites may not have been correct for some diguanylate cyclase genes, or some

423 genes may have been expressed at earlier or later times during colonization. Further, some of the  
424 diguanylate cyclases that were not tested based on higher levels of expression (over 2.00) under  
425 normal growth conditions may have important roles during plant colonization. To date, we know  
426 of only one other diguanylate cyclase, Chp8 from *Pseudomonas syringae* pv. Tomato DC3000,  
427 that has been shown to be activated in the presence of plants and appears to be involved in reducing  
428 flagellin expression, increasing EPS production, and avoiding plant immune responses (52).  
429 Interestingly, the ability to suppress flagellar gene expression is a key strategy in avoiding plant  
430 immune responses since flagellin is a common pathogen-associated molecular pattern (PAMP)  
431 protein (53). While this appears to be a common strategy among plant pathogens for host invasion,  
432 there have been only a few reports describing the role of c-di-GMP in these processes (54).

433 We focused our characterization studies on DGC2884 which exhibited the most dramatic  
434 phenotypes when overexpressed, including modulating EPS production, motility, and biofilm  
435 formation. Perhaps one of the more intriguing attributes of DGC2884 is the N-terminal CHASE  
436 domain which appears to be necessary for localization and enzyme function. Furthermore, we  
437 found that the full-length DGC2884 localized as discrete foci within the cell, suggesting that this  
438 enzyme may influence local concentrations of c-di-GMP or may localize in order to yield  
439 specificity in its downstream effects. As expected, deletion of the N-terminal transmembrane  
440 domain impacted localization of DGC2884; in addition, given the behavioral defects observed in  
441 this mutant, these data together further support the important role of this transmembrane domain  
442 to the enzyme activity of DGC2884. As mentioned previously, the domain architecture and gene  
443 neighborhood of DGC2884 resembles that of YfiN from various bacterial species. Although these  
444 proteins are not entirely the same, some parallels can be drawn. For example, YfiN in *P.*  
445 *aeruginosa*, *E. coli*, and *S. enterica* have each been shown to impact production of small colony

446 variants, swimming motility and EPS production, similar to DGC2884 (34, 35). Interestingly,  
447 YfiN has been shown to modulate production of Psl polysaccharides, whose operon possesses  
448 genes also found to regulate amylovoran biosynthesis in *Erwinia amylovora* (33, 34, 55). While  
449 the specific stimuli for each of these enzymes is not yet known, some studies suggest a reductive  
450 or osmotic stress may serve as an input to this system (33, 34, 56). This may imply that the  
451 chemical environment of the rhizosphere induces expression of this diguanylate cyclase; however,  
452 further experimentation is required to test this. The YfiN enzyme has been found in microbial  
453 isolates from many different environments, ranging from cystic fibrosis patients to the rhizosphere  
454 of *Populus*, raising intriguing questions about what types of environmental stimuli activate this  
455 enzyme and how that translates into downstream behaviors. Further studies of enzymes like  
456 DGC2884 may provide important insights into the functions of both medically-important and  
457 agriculturally important microbes, such as the closely related pathogens *Erwinia amylovora* or  
458 *Pantoea stewartii* (57, 58).

459 Transposon mutagenesis of *Pantoea* sp. YR343 (pSRK-*DGC2884*) resulted in 136 mutants  
460 that affected a total of 61 genes identified from a small-scale library consisting of approximately  
461 5,000 different clones. Surprisingly, approximately one-third of these mutants were affected in a  
462 component of the flagellar export apparatus, *fliR*, and we are currently investigating the role of this  
463 protein in relation to DGC2884. Although we obtained a wide selection of mutants, the conditions  
464 of our mutagenesis assay likely did not reach saturation, yielding the possibility that there are other  
465 genes of interest that have not yet been identified. Among the transposon mutants described here,  
466 the phenotypes we observed for the UDP::*Tn5*, CAP::*Tn5*, GlpF::*Tn5*, Ndk::*Tn5*, and FliR::*Tn5*  
467 mutants in biofilm formation and root colonization yielded some interesting insights into possible  
468 roles of these genes in the rhizosphere. The UDP::*Tn5* and CAP::*Tn5* mutants each have predicted

469 roles in exopolysaccharide biosynthesis and transport (59). The GlpF::Tn5 mutant affects an  
470 aquaglyceroporin that is involved in water and glycerol uptake and may be involved in  
471 osmoregulation (60). The Ndk::Tn5 mutant affects a nucleoside diphosphate kinase that has been  
472 shown to have a role in regulating cell growth and signaling, as well as cell surface polysaccharides  
473 in *P. aeruginosa* and *Mycobacterium tuberculosis* (61). Lastly, FliR is a member of the flagellar  
474 export apparatus(62-64).

475 Exopolysaccharides are known to play an important role in biofilm formation and root  
476 colonization (7, 9, 65). Many *Pantoea* species are associated with plants, some as pathogens while  
477 others appear to be beneficial (66). Two closely related species, *P. stewartii* and *E. amylovora*,  
478 have been shown to produce specific types of EPS, known as stewartan and amylovoran, that are  
479 integral to their function as pathogens (58, 67-69). Stewartan and amylovoran are involved in  
480 clogging the flow of xylem in plant tissues and causing Stewart's wilt disease in corn and fire  
481 blight in various fruit trees, such as pears and apples (68, 70). The composition of EPS is similar  
482 between stewartan and amylovoran and consists primarily of galactose, glucose, and glucuronic  
483 acid (71-73). While the composition and structure of EPS produced by *Pantoea* sp. YR343 has  
484 not yet been characterized, the genome does encode a large operon that is homologous to the  
485 operons found to be responsible for production of stewartan and amylovoran in *P. stewartii* and *E.*  
486 *amylovora*, respectively. The described UDP-galactose lipid carrier transferase (UDP) gene, for  
487 which we have a mini-Tn5 insertion, is the first gene in this operon and it is likely that disruption  
488 of this gene affects the entire operon. Interestingly, *Pantoea* sp. YR343 has two genes with  
489 similarity to the UDP-galactose lipid carrier transferase (PMI39\_01848 and PMI39\_04793) and  
490 analysis of closely related species has shown that the presence of more than one UDP-galactose  
491 lipid carrier transferase is common. The other UDP gene (PMI39\_04793) is annotated as WbaP

492 and is most likely involved in lipopolysaccharide biosynthesis. To date, there has been extensive  
493 research done to describe lipopolysaccharide biosynthesis, including the role of WbaP in that  
494 process (for some reviews, see (74, 75)). While studies of this EPS have focused primarily on its  
495 role in pathogenesis, we have not found any evidence to suggest that *Pantoea* sp. YR343 is  
496 pathogenic under the conditions tested (25); rather, we have found that *Pantoea* sp. YR343 is a  
497 robust root colonizer and mutations affecting EPS result in a significant reduction in root  
498 colonization. We show here that the UDP::Tn5 mutant shows little observable root colonization,  
499 while the CAP::Tn5 mutant colonizes well, but in a pattern that differs significantly from the wild  
500 type. Interestingly, there were no indications of a colonization defect in the CAP::Tn5 mutant  
501 based on cell number per gram root; however, imaging studies indicated that the CAP::Tn5 mutant  
502 does not form patches of cell aggregates on the root surface, suggesting differences in the amount  
503 or composition of EPS in this mutant. Further studies into the composition and structure of the  
504 EPS from *Pantoea* sp. YR343 may yield insights into its function during plant association.  
505 Furthermore, as mentioned previously, it has been found that the YfiN enzyme can regulate  
506 production of the Psl polysaccharide in *P. aeruginosa*, suggesting a possible linkage to activation  
507 of EPS production by DGC2884 in *Pantoea* sp. YR343.

508       Lastly, we did observe an increase in root colonization by the Type VI::Tn5, ABC::Tn5,  
509 and Ndk::Tn5 mutants, although the increases were slight. Interestingly, the patterns of  
510 colonization in the Ndk::Tn5 mutant were mostly in the form of small patches along the root  
511 surface, while colonization by the TypeVI::Tn5 and ABC::Tn5 mutants were observed as both  
512 small patches and long strips along the root hairs. It is interesting to speculate that some of these  
513 genes may be involved in regulating colonization location, as well as pattern formation during root  
514 colonization. For example, the Type VI secretion system has been shown to be fairly widespread



515 across plant-associated proteobacteria where the Type VI system is believed to promote fitness  
516 and competition within the rhizosphere during root colonization (76). Perhaps without this system,  
517 the cells are unable to colonize the older tissue along the primary plant root, but can better colonize  
518 the softer root hairs. More studies will be required to understand how these different gene products  
519 are involved in regulating colonization behaviors. Techniques involving imaging of spatial  
520 colonization patterns along plant roots, in addition to quantification by cell counts, can provide  
521 additional information about how these bacteria behave in the environment and how these  
522 mutations affect that behavior.

523 In summary, we have shown that growth in the presence of a plant host results in expression  
524 of genes encoding the diguanylate cyclases, DGC2884, DGC3006, and DGC3134 in *Pantoea* sp  
525 YR343. While similarities between YfiN and DGC2884 suggest environmental stresses as a  
526 stimulus, further characterization is needed to understand what triggers expression of these c-di-  
527 GMP signaling pathways in the rhizosphere. While there were 61 genes identified through  
528 transposon mutagenesis, we have only just begun to characterize how those gene products  
529 influence root colonization behavior and how they function in that process. Finally, the finding  
530 that at least three diguanylate cyclases were expressed on plant roots suggests how important c-di-  
531 GMP signaling is for the process of root colonization by *Pantoea* sp. YR343. Characterizing the  
532 coordination of these three diguanylate cyclases in the process of root colonization by *Pantoea* sp.  
533 YR343 will enhance our understanding of c-di-GMP regulation across bacteria and yield important  
534 insights into the roles of multiple diguanylate cyclases in coordinating these behaviors.

## 535 **Materials and Methods**

536 *Bacterial strains and growth conditions.* Table S1 describes the bacterial strains and plasmids  
537 used throughout this study. *E. coli* strains were grown in Luria Broth (LB) media (10 g Tryptone,

538 5 g Yeast Extract, and 10 g NaCl per 1 liter) with shaking at 37°C. *Pantoea* strains were grown in  
539 either R2A broth (TEKnova, Inc.), LB, TY (10 g tryptone and 5 g yeast extract per 1 liter), or M9  
540 media with 0.4% glucose and grown at 28°C. Growth curve assays were performed using 96-well  
541 plates in a Biotek Cytation 5 plate reader. Motility assays were performed on low agar plates  
542 prepared by adding 0.3% agar to LB media. Congo Red plates (for EPS analysis) were prepared  
543 by adding Congo Red to R2A or LB media at a concentration of 40 µg ml<sup>-1</sup>.

544 *Construction of promoter-reporter plasmids.* To generate reporter constructs, we analyzed the  
545 genomic sequences upstream of the predicted ATG start sites of each diguanylate cyclase in order  
546 to identify putative promoters using BPROM (31). We then cloned 200 bp regions encoding the  
547 predicted promoters for use in the reporter construct, pPROBE-NT (30). Primers used to amplify  
548 each of these promoter regions are listed in Table S2. Final constructs were verified using  
549 restriction digests, prior to introduction into *Pantoea* sp. YR343 using electroporation.

550 *Construction of diguanylate cyclase expression vectors.* DGC2884 and DGC2884ΔTM were  
551 amplified by PCR from genomic DNA using the primers listed in Table S2. PCR products were  
552 digested with BamHI and HindIII before ligation into pSRK-Km or pSRK-Gm(77). The  
553 DGC2884 AADEF mutant was generated using a QuikChange Site-directed mutagenesis kit, with  
554 the cloned wild type DGC2884 as a template, and the resulting construct was verified by  
555 sequencing. Each construct was verified before transforming into electrocompetent wild type  
556 *Pantoea* sp. YR343, as described previously (25). Each overexpression strain was maintained  
557 with either 50 µg mL<sup>-1</sup> kanamycin (pSRK-Km) or 10 µg mL<sup>-1</sup> gentamycin (pSRK-Gm) and  
558 induction was performed by adding 1 mM isopropyl β-D-1-thiogalactopyranoside (IPTG).

559 Tagged diguanylate cyclases were generated by PCR amplification of each diguanylate  
560 cyclase followed by cloning into pENTR D-TOPO (ThermoFisher Scientific) and then transferred

561 to either pRH016 (HA tag) or pRH018 (Myc tag) (78). Final constructs containing HA or Myc  
562 tags were then introduced into *Pantoea* YR343 via electroporation as described previously (25).

563 *Biofilm formation assays.* We tested biofilm formation on vinyl coverslips using cultures grown  
564 in M9 minimal media supplemented with 0.4% glucose. Coverslips were sterilized by soaking in  
565 100% bleach for 20 minutes and then rinsed twice in sterile water before placing in a sterile 12-  
566 well tissue culture dish. Sterility was tested using sterile M9 media with 0.4% glucose with  
567 sterilized coverslips. Cultures were grown in M9 minimal media overnight, then diluted 1:100  
568 into fresh M9 media with 0.4% glucose (1 mM IPTG was added for strains with pSRK). Diluted  
569 cultures (1 mL) were then placed into a 12-well tissue culture dish (three replicates per strain)  
570 along with a sterilized vinyl coverslip placed at an angle. A breathable cover was placed over the  
571 12-well tissue culture dish and was placed at 28°C for 72 hours. Coverslips were then removed  
572 and rinsed in water prior to staining with crystal violet as described previously (25). Expression  
573 using GFP reporter strains was measured by rinsing coverslips and imaging large sections of  
574 biofilms over a minimum of three separate fields of view. Details of image analysis are described  
575 below.

576 *Pellicle formation assays.* Pellicle assays were performed as described previously (25). In order  
577 to quantify the percentage of cells within each pellicle, we collected 100  $\mu$ L of cells from the non-  
578 pellicle portion of each culture, then used a glass homogenizer to disperse the pellicle with the  
579 remaining culture. From the homogenized culture, we collected 100  $\mu$ L of cells. The OD (600  
580 nm) was measured for the homogenized culture, as well as the non-pellicle portion, in order to  
581 calculate the percentage of cells that were in the pellicle. There were three biological replicates  
582 measured per experiment. Expression using GFP reporter strains was measured by placing pellicle

583 cultures in a 96-well dish and normalizing fluorescence measurements to cell density (OD at 600  
584 nm) as measured using the Biotek Cytation 5 plate reader.

585 *Expression of diguanylate cyclases and enzyme assays using Vc2-Spinach.* We obtained the  
586 pET31b-Vc2 Spinach vector as a gift from Dr. Ming Hammond and used *E. coli* BL21 DE3 Star  
587 cells to co-express the Vc2-Spinach tRNA (from pET31b-Vc2 Spinach) with each diguanylate  
588 cyclase construct (pSRK (Km) DGC2884, pSRK (Km) DGC2884 AADEF, pSRK (Km) and  
589 DGC2884 $\Delta$ TM) individually as described previously (45). We verified expression of each of these  
590 constructs by RT-PCR using protocols described below (see *Expression analysis*). Measurement  
591 of c-di-GMP using the Vc2-Spinach aptamer was performed as described previously (45).

592 *Expression analysis.* In order to ensure expression of diguanylate cyclase genes, we performed  
593 RT-PCR using primer sets for each diguanylate cyclase (primers listed in Table S2). RNA  
594 extraction was performed using the Qiagen RNeasy Mini Kit according to manufacturer's  
595 protocols. The SuperScript IV RT-PCR system (ThermoFisher Scientific) was used for generating  
596 cDNA according to manufacturer's procedures and final PCR reactions were performed according  
597 to standard protocols.

598 *Immunolocalization and Western blotting.* Immunolocalization was performed on *Pantoea* sp.  
599 YR343 (pRH016-*DGC2884*) and YR343 (pRH018-*DGC2884* $\Delta$ TM) using mouse polyclonal  
600 antibodies against HA (ab16918 from Abcam) or Myc (13-2500 from Invitrogen). Approximately  
601 3 mL of cell culture grown to a low cell density was collected, washed in PBS, and fixed in ice  
602 cold methanol for 1 hour at -20°C. Afterwards, cells were placed onto poly-L-lysine coated  
603 coverslips and allowed to dry before lysing with 2 mg mL<sup>-1</sup> lysozyme solution in GTE buffer (50  
604 mM glucose, 20 mM Tris-HCl pH 8.0, 10 mM EDTA) for 10 minutes, followed by incubation  
605 overnight at 4°C in a blocking solution consisting of 1% non-fat dry milk in PBS, pH 7.0. After

606 washing twice with PBS, the antibody solution consisting of 1% non-fat dry milk in PBS with  
607 either 1:250 dilution of anti-HA or 1:125 dilution of anti-Myc antibody was added and incubated  
608 for 2 hrs at room temperature. The coverslips were rinsed in PBS and then incubated with Alexa  
609 Fluor 488 goat anti-mouse IgG at a 1:500 dilution in 1% non-fat dry milk in PBS for 2 hours at  
610 room temperature. Coverslips were washed in PBS, mounted on slides and imaged using a Zeiss  
611 LSM710 confocal microscope.

612 Lysates were prepared for western blotting by collecting cell pellets from cultures grown  
613 overnight, then lysed by sonication. The crude lysate was centrifuged and supernatants were used  
614 for SDS-PAGE gels. Western blotting was performed according to standard protocols using the  
615 same mouse monoclonal antibodies used for immunolocalization.

616 *Transposon mutagenesis and rescue cloning.* Biparental mating was used to introduce the plasmid  
617 pRL27, encoding a mini-Tn5 transposon, into *Pantoea* sp. YR343 (DGC2884 pSRK-Gm)  
618 essentially as described previously, but on a smaller scale (79). Removal of *E. coli* strain EA145  
619 was performed by growing *Pantoea* in the presence of kanamycin (50  $\mu\text{g mL}^{-1}$ ) and gentamycin  
620 (10  $\mu\text{g mL}^{-1}$ ). Screening of the transposon library was performed by plating the library onto LB  
621 plates containing Congo Red (40  $\mu\text{g mL}^{-1}$ ), 1 mM IPTG, kanamycin (50  $\mu\text{g mL}^{-1}$ ) and gentamycin  
622 (10  $\mu\text{g mL}^{-1}$ ). Colonies differing in appearance from the parental strain were isolated for further  
623 characterization and for sequencing.

624 In order to identify the location of transposon insertions, we used a cloning approach  
625 described previously (79). Basically, we isolated genomic DNA from each mutant using the  
626 Promega Wizard Genomic DNA Extraction Kit, digested with a single restriction enzyme (most  
627 often used EcoRI, but sometimes used BamHI, PstI, SalI, SacII, and SphI) that does not cut within  
628 the transposon, ligated the DNA into plasmids, transformed these plasmids into *E. coli* PIR1 cells

629 (ThermoFisher Scientific) and then plated onto selective plates containing 50  $\mu\text{g mL}^{-1}$  kanamycin  
630 (transposon sequence contained a kanamycin resistance marker). Colonies were picked and  
631 plasmid DNA was isolated using the QIAprep Spin Miniprep Kit (Qiagen) and plasmids were  
632 sequenced at the Molecular Biology Resource Facility at the University of Tennessee, Knoxville.  
633 We sequenced each plasmid from the transposon outwards using the following primers, tpnRL17-1  
634 and tpnRL13-1 (79). All resulting sequences were analyzed using BlastX from NCBI in order to  
635 identify the region of DNA flanking each transposon.

636 Individual transposon mutants were grown three to four times sequentially on rich media  
637 without selection in order to remove the pSRK (Gm)-*DGC2884* plasmid. Removal of the plasmid  
638 was verified by growth on kanamycin at 50  $\mu\text{g mL}^{-1}$ , but not on gentamycin at 10  $\mu\text{g mL}^{-1}$ .

639 *Construction of fluorescent strains.* We generated fluorescent strains that were also resistant to  
640 gentamycin by integrating either GFP or mCherry into the chromosome of *Pantoea* sp. YR343  
641 using the pBT270 and pBT277 plasmids which use the Tn7 transposon system for chromosomal  
642 insertions (gift from B.S. Tseng and(80). Colonies with chromosomally inserted GFP or mCherry  
643 were selected on R2A agar containing gentamycin at 10  $\mu\text{g mL}^{-1}$ .

644 *Plant growth conditions and inoculation.* Wheat seeds were grown in special growth chambers  
645 (Advanced Science Tools, LLC – <http://advancedsciencetools.com/index.html>) which allow for  
646 visualization of plant roots without sacrificing the plants. Wheat seeds were surface-sterilized, as  
647 performed previously (25) and placed into the chamber filled with sterile soil. Once seeds were  
648 germinated and had both stem and roots, plants were inoculated with *Pantoea* sp. YR343, as  
649 described previously (25). Plants were incubated with *Pantoea* sp. YR343 for 7 days prior to  
650 visualization using confocal microscopy.

651 Colonization of *Populus trichocarpa* BESC819 was performed as described previously  
652 (25). Five plants were used per treatment (with approximately  $10^7$  cells per plant) and incubations  
653 were for three weeks prior to harvesting and counting. Visualization of non-fluorescently labelled  
654 cells was performed by staining with Syto 9, as described previously (25).

655 *Confocal fluorescence microscopy and image analysis.* Biofilms were imaged for promoter  
656 expression analysis using a Biotek Cytation 5 plate reader. Images were taken from at least three  
657 separate fields-of-view per sample. In order to quantify fluorescence, we drew nine square regions  
658 of interest per image using Fiji ImageJ and measured fluorescence intensity per square for all  
659 images. The average fluorescence intensity per square micrometer, as well as the S.E.M. values  
660 were calculated for each sample and then normalized against the pPROBE empty vector control.

661 Confocal fluorescence microscopy was performed using a Zeiss LSM710 confocal laser  
662 scanning microscope with a Plan-Apochromat 63x/1.40 oil immersion objective (Carl Zeiss  
663 Microimaging, Thornwood, NY). Images were processed using Zen2012 software (Zeiss). Cell  
664 fluorescence intensity measurements were performed using Fiji ImageJ for assays with promoter-  
665 reporter fusions for DGCs and for the Vc2 Spinach aptamer following the protocol described by  
666 Kellenberger, et al (45). Briefly, images were initially collected using the same parameters and  
667 then collectively processed so that brightness and contrast was adjusted and normalized across the  
668 entire set of images used for analysis. Using brightfield images, individual regions-of-interest  
669 were drawn for a minimum of 50 cells, then used to measure fluorescence in corresponding  
670 fluorescent images.

671

672

673

674 **Acknowledgements**

675 We would like to thank Dr. B. S. Tseng (University of Washington) for sharing plasmids pBT270  
676 and pBT277, as well as Dr. Alison Buchan (University of Tennessee, Knoxville) for sharing the  
677 pRL27 plasmid, and finally, Dr. Ming Hammond (University of Utah) for sharing pET31b-Vc2  
678 Spinach. This research was sponsored by the Genomic Science Program, U.S. Department of  
679 Energy, Office of Science, Biological and Environmental Research, as part of the Plant Microbe  
680 Interfaces Scientific Focus Area (<http://pmi.ornl.gov>). Oak Ridge National Laboratory is managed  
681 by UT-Battelle LLC, for the U.S. Department of Energy under contract DE-AC05-00OR22725.

682 **References**

683

- 684 1. Feng H, Zhang N, Du W, Zhang H, Liu Y, Fu R, et al. Identification of chemotaxis  
685 compounds in root exudates and their sensing chemoreceptors in plant-growth-promoting  
686 rhizobacteria *Bacillus amyloliquefaciens* SQR9. *Mol Plant Microbe Interact.* 2018;31(10):995-  
687 1005.
- 688 2. de Weert S, Vermeiren H, Mulders IH, Kuiper I, Hendrickx N, Bloemberg GV, et al.  
689 Flagella-driven chemotaxis towards exudate components is an important trait for tomato root  
690 colonization by *Pseudomonas fluorescens*. *Mol Plant Microbe Interact.* 2002;15(11):1173-80.
- 691 3. Gaworzewska ET, Carlile MJ. Positive chemotaxis of *Rhizobium leguminosarum* and  
692 other bacteria towards root exudates from legumes and other plants. *Microbiology* (Reading,  
693 England). 1982;128(6):1179-88.
- 694 4. Currier WW, Strobel GA. Chemotaxis of *Rhizobium* spp. to plant root exudates. *Plant*  
695 *physiology.* 1976;57(5):820-3.



- 696 5. Hartmann A, Schmid M, Van Tuinen D, Berg G. Plant-driven selection of microbes.  
697 Plant and Soil. 2009;321(1-2):235-57.
- 698 6. Lugtenberg B, Kamilova F. Plant-growth-promoting rhizobacteria. Annu Rev Microbiol.  
699 2009;63:541-56.
- 700 7. Danhorn T, Fuqua C. Biofilm formation by plant-associated bacteria. Annu Rev  
701 Microbiol. 2007;61:401-22.
- 702 8. Hibbing ME, Fuqua C, Parsek MR, Peterson SB. Bacterial competition: surviving and  
703 thriving in the microbial jungle. Nature reviews Microbiology. 2010;8(1):15-25.
- 704 9. Ramey BE, Koutsoudis M, von Bodman SB, Fuqua C. Biofilm formation in plant-  
705 microbe associations. Curr Opin Microbiol. 2004;7(6):602-9.
- 706 10. Schaefer AL, Lappala CR, Morlen RP, Pelletier DA, Lu T-YS, Lankford PK, et al. LuxR-  
707 and LuxI-type quorum-sensing circuits are prevalent in members of the *Populus deltoides*  
708 microbiome. Appl Environ Microbiol. 2013;79(18):5745-52.
- 709 11. Hengge R. Principles of c-di-GMP signalling in bacteria. Nature reviews Microbiology.  
710 2009;7(4):263-73.
- 711 12. Jenal U, Malone J. Mechanisms of cyclic-di-GMP signaling in bacteria. Annu Rev Genet.  
712 2006;40:385-407.
- 713 13. Romling U, Galperin MY, Gomelsky M. Cyclic di-GMP: the first 25 years of a universal  
714 bacterial second messenger. Microbiol Mol Biol Rev. 2013;77(1):1-52.
- 715 14. Valentini M, Filloux A. Biofilms and cyclic di-gmp (c-di-gmp) signaling: lessons from  
716 *Pseudomonas aeruginosa* and other bacteria. The Journal of biological chemistry.  
717 2016;291(24):12547-55.

- 718 15. Sondermann H, Shikuma NJ, Yildiz FH. You've come a long way: c-di-GMP signaling.  
719 Current opinion in microbiology. 2012;15(2):140-6.
- 720 16. Kalia D, Merey G, Nakayama S, Zheng Y, Zhou J, Luo Y, et al. Nucleotide, c-di-GMP,  
721 c-di-AMP, cGMP, cAMP,(p) ppGpp signaling in bacteria and implications in pathogenesis.  
722 Chemical Society Reviews. 2013;42(1):305-41.
- 723 17. Boehm A, Kaiser M, Li H, Spangler C, Kasper CA, Ackermann M, et al. Second  
724 messenger-mediated adjustment of bacterial swimming velocity. Cell. 2010;141(1):107-16.
- 725 18. Paul K, Nieto V, Carlquist WC, Blair DF, Harshey RM. The c-di-GMP binding protein  
726 YcgR controls flagellar motor direction and speed to affect chemotaxis by a "backstop brake"  
727 mechanism. Mol Cell. 2010;38(1):128-39.
- 728 19. Krasteva PV, Fong JC, Shikuma NJ, Beyhan S, Navarro MV, Yildiz FH, et al. *Vibrio*  
729 *cholerae* VpsT regulates matrix production and motility by directly sensing cyclic di-GMP.  
730 science. 2010;327(5967):866-8.
- 731 20. Ryjenkov DA, Simm R, Romling U, Gomelsky M. The PilZ domain is a receptor for the  
732 second messenger c-di-GMP: the PilZ domain protein YcgR controls motility in enterobacteria.  
733 The Journal of biological chemistry. 2006;281(41):30310-4.
- 734 21. Amikam D, Galperin MY. PilZ domain is part of the bacterial c-di-GMP binding protein.  
735 Bioinformatics. 2006;22(1):3-6.
- 736 22. Fang X, Ahmad I, Blanka A, Schottkowski M, Cimdins A, Galperin MY, et al. GIL, a  
737 new c-di-GMP-binding protein domain involved in regulation of cellulose synthesis in  
738 enterobacteria. Molecular microbiology. 2014;93(3):439-52.
- 739 23. Sudarsan N, Lee ER, Weinberg Z, Moy RH, Kim JN, Link KH, et al. Riboswitches in  
740 eubacteria sense the second messenger cyclic di-GMP. Science. 2008;321(5887):411-3.

- 741 24. Christen B, Christen M, Paul R, Schmid F, Folcher M, Jenoe P, et al. Allosteric control of  
742 cyclic di-GMP signaling. *The Journal of biological chemistry*. 2006;281(42):32015-24.
- 743 25. Bible AN, Fletcher SJ, Pelletier DA, Schadt CW, Jawdy SS, Weston DJ, et al. A  
744 carotenoid-deficient mutant in *Pantoea* sp. YR343, a bacteria isolated from the rhizosphere of  
745 *Populus deltoides*, is defective in root colonization. *Frontiers in microbiology*. 2016;7:491.
- 746 26. Cregger M, Carper DL, Christel S, Doktycz M, Labbe J, Michener J, et al. Plant-microbe  
747 interactions: from genes to ecosystems using *Populus* as a model system. *Phytobiomes Journal*.  
748 2021(ja).
- 749 27. Estenson K, Hurst GB, Standaert RF, Bible AN, Garcia D, Chourey K, et al.  
750 Characterization of indole-3-acetic acid biosynthesis and the effects of this phytohormone on the  
751 proteome of the plant-associated microbe *Pantoea* sp. YR343. *Journal of proteome research*.  
752 2018.
- 753 28. Garcia DC, Cheng X, Land ML, Standaert RF, Morrell-Falvey JL, Doktycz MJ.  
754 Computationally guided discovery and experimental validation of indole-3-acetic acid synthesis  
755 pathways. *ACS chemical biology*. 2019;14(12):2867-75.
- 756 29. El-Gebali S, Mistry J, Bateman A, Eddy SR, Luciani A, Potter SC, et al. The Pfam  
757 protein families database in 2019. *Nucleic Acids Res*. 2018;47(D1):D427-D32.
- 758 30. Miller WG, Leveau JH, Lindow SE. Improved gfp and inaZ broad-host-range promoter-  
759 probe vectors. *Mol Plant Microbe Interact*. 2000;13(11):1243-50.
- 760 31. Solovyev V. V. Solovyev, A Salamov (2011) Automatic Annotation of Microbial  
761 Genomes and Metagenomic Sequences. In *Metagenomics and its Applications in Agriculture,*  
762 *Biomedicine and Environmental Studies* (Ed. R.W. Li), Nova Science Publishers, p.61-78. 2011.  
763 p. 61-78.

- 764 32. Yang CY, Chin KH, Chuah ML, Liang ZX, Wang AH, Chou SH. The structure and  
765 inhibition of a GGDEF diguanylate cyclase complexed with (c-di-GMP)<sub>2</sub> at the active site.  
766 Acta Crystallogr D Biol Crystallogr. 2011;67(Pt 12):997-1008.
- 767 33. Malone JG, Jaeger T, Manfredi P, Dötsch A, Blanka A, Bos R, et al. The YfiBNR signal  
768 transduction mechanism reveals novel targets for the evolution of persistent *Pseudomonas*  
769 *aeruginosa* in cystic fibrosis airways. PLOS Pathogens. 2012;8(6):e1002760.
- 770 34. Malone JG, Jaeger T, Spangler C, Ritz D, Spang A, Arrieumerlou C, et al. YfiBNR  
771 mediates cyclic di-GMP dependent small colony variant formation and persistence in  
772 *Pseudomonas aeruginosa*. PLoS Pathog. 2010;6(3):e1000804.
- 773 35. Kim HK, Harshey RM. A diguanylate cyclase acts as a cell division inhibitor in a two-  
774 step response to reductive and envelope stresses. mBio. 2016;7(4):e00822-16.
- 775 36. Madeira F, Park YM, Lee J, Buso N, Gur T, Madhusoodanan N, et al. The EMBL-EBI  
776 search and sequence analysis tools APIs in 2019. Nucleic Acids Res. 2019;47(W1):W636-W41.
- 777 37. Malone JG, Williams R, Christen M, Jenal U, Spiers AJ, Rainey PB. The structure-  
778 function relationship of WspR, a *Pseudomonas fluorescens* response regulator with a GGDEF  
779 output domain. Microbiology (Reading, England). 2007;153(Pt 4):980-94.
- 780 38. Al-Bassam MM, Haist J, Neumann SA, Lindenberg S, Tschowri N. Expression Patterns,  
781 Genomic Conservation and Input Into Developmental Regulation of the GGDEF/EAL/HD-GYP  
782 Domain Proteins in *Streptomyces*. Frontiers in microbiology. 2018;9:2524.
- 783 39. den Hengst CD, Tran NT, Bibb MJ, Chandra G, Leskiw BK, Buttner MJ. Genes essential  
784 for morphological development and antibiotic production in *Streptomyces coelicolor* are targets  
785 of BldD during vegetative growth. Molecular microbiology. 2010;78(2):361-79.

- 786 40. Purcell EB, McKee RW, McBride SM, Waters CM, Tamayo R. Cyclic diguanylate  
787 inversely regulates motility and aggregation in *Clostridium difficile*. J Bacteriol.  
788 2012;194(13):3307-16.
- 789 41. Waters CM, Lu W, Rabinowitz JD, Bassler BL. Quorum sensing controls biofilm  
790 formation in *Vibrio cholerae* through modulation of cyclic di-GMP levels and repression of  
791 vpsT. J Bacteriol. 2008;190(7):2527-36.
- 792 42. Wood PJ, Flucher RG. Interaction of some dyes with cereal beta-glucans. Cereal  
793 Chemistry. 1978;55(6):952-66.
- 794 43. Wolfe AJ, Visick KL. Get the message out: cyclic-Di-GMP regulates multiple levels of  
795 flagellum-based motility. J Bacteriol. 2008;190(2):463-75.
- 796 44. Römling U, Amikam D. Cyclic di-GMP as a second messenger. Current opinion in  
797 microbiology. 2006;9(2):218-28.
- 798 45. Kellenberger CA, Wilson SC, Sales-Lee J, Hammond MC. RNA-based fluorescent  
799 biosensors for live cell imaging of second messengers cyclic di-GMP and cyclic AMP-GMP. J  
800 Am Chem Soc. 2013;135(13):4906-9.
- 801 46. Omasits U, Ahrens CH, Muller S, Wollscheid B. Protter: interactive protein feature  
802 visualization and integration with experimental proteomic data. Bioinformatics. 2014;30(6):884-  
803 6.
- 804 47. Taylor BL, Zhulin IB. PAS domains: internal sensors of oxygen, redox potential, and  
805 light. Microbiology and Molecular Biology Reviews. 1999;63(2):479-506.
- 806 48. Zhulin IB, Nikolskaya AN, Galperin MY. Common extracellular sensory domains in  
807 transmembrane receptors for diverse signal transduction pathways in Bacteria and Archaea. J  
808 Bacteriol. 2003;185(1):285-94.

- 809 49. Anantharaman V, Aravind L. The CHASE domain: a predicted ligand-binding module in  
810 plant cytokinin receptors and other eukaryotic and bacterial receptors. Trends Biochem Sci.  
811 2001;26(10):579-82.
- 812 50. Nikolskaya AN, Mulkidjanian AY, Beech IB, Galperin MY. MASE1 and MASE2: two  
813 novel integral membrane sensory domains. J Mol Microbiol Biotechnol. 2003;5(1):11-6.
- 814 51. Noirot-Gros MF, Shinde S, Larsen PE, Zerbs S, Korajczyk PJ, Kemner KM, et al.  
815 Dynamics of aspen roots colonization by Pseudomonads reveals strain-specific and mycorrhizal-  
816 specific patterns of biofilm formation. Frontiers in microbiology. 2018;9:853.
- 817 52. Engl C, Waite CJ, McKenna JF, Bennett MH, Hamann T, Buck M. Chp8, a diguanylate  
818 cyclase from *Pseudomonas syringae* pv. Tomato DC3000, suppresses the pathogen-associated  
819 molecular pattern flagellin, increases extracellular polysaccharides, and promotes plant immune  
820 evasion. MBio. 2014;5(3):e01168-14.
- 821 53. Jones JDG, Dangl JL. The plant immune system. Nature. 2006;444(7117):323-9.
- 822 54. Pfeilmeier S, Saur IM, Rathjen JP, Zipfel C, Malone JG. High levels of cyclic-di-GMP in  
823 plant-associated *Pseudomonas* correlate with evasion of plant immunity. Mol Plant Pathol.  
824 2016;17(4):521-31.
- 825 55. Jackson KD, Starkey M, Kremer S, Parsek MR, Wozniak DJ. Identification of psl, a  
826 locus encoding a potential exopolysaccharide that is essential for *Pseudomonas aeruginosa*  
827 PAO1 biofilm formation. J Bacteriol. 2004;186(14):4466-75.
- 828 56. Giardina G, Paiardini A, Fericola S, Franceschini S, Rinaldo S, Stelitano V, et al.  
829 Investigating the allosteric regulation of YfiN from *Pseudomonas aeruginosa*: clues from the  
830 structure of the catalytic domain. PloS one. 2013;8(11):e81324.

- 831 57. Falkenstein H, Bellemann P, Walter S, Zeller W, Geider K. Identification of *Erwinia*  
832 *amylovora*, the fireblight pathogen, by colony hybridization with DNA from plasmid pEA29.  
833 Appl Environ Microbiol. 1988;54(11):2798-802.
- 834 58. Roper MC. *Pantoea stewartii* subsp. *stewartii*: lessons learned from a xylem-dwelling  
835 pathogen of sweet corn. Molecular plant pathology. 2011;12(7):628-37.
- 836 59. Bernhard F, Coplin DL, Geider K. A gene cluster for amylovoran synthesis in *Erwinia*  
837 *amylovora*: characterization and relationship to cps genes in *Erwinia stewartii*. Molecular and  
838 General Genetics MGG. 1993;239(1):158-68.
- 839 60. Hénin J, Tajkhorshid E, Schulten K, Chipot C. Diffusion of glycerol through *Escherichia*  
840 *coli* aquaglyceroporin GlpF. Biophysical journal. 2008;94(3):832-9.
- 841 61. Chakrabarty AM. Nucleoside diphosphate kinase: role in bacterial growth, virulence, cell  
842 signalling and polysaccharide synthesis. Molecular microbiology. 1998;28(5):875-82.
- 843 62. Fan F, Ohnishi K, Francis NR, Macnab RM. The FliP and FliR proteins of *Salmonella*  
844 *typhimurium*, putative components of the type III flagellar export apparatus, are located in the  
845 flagellar basal body. Molecular microbiology. 1997;26(5):1035-46.
- 846 63. Malakooti J, Ely B, Matsumura P. Molecular characterization, nucleotide sequence, and  
847 expression of the fliO, fliP, fliQ, and fliR genes of *Escherichia coli*. J Bacteriol.  
848 1994;176(1):189-97.
- 849 64. Ohnishi K, Fan F, Schoenhals GJ, Kihara M, Macnab RM. The FliO, FliP, FliQ, and FliR  
850 proteins of *Salmonella typhimurium*: putative components for flagellar assembly. J Bacteriol.  
851 1997;179(19):6092-9.
- 852 65. Castiblanco LF, Sundin GW. New insights on molecular regulation of biofilm formation  
853 in plant-associated bacteria. Journal of integrative plant biology. 2016;58(4):362-72.

- 854 66. Walterson AM, Stavrinides J. *Pantoea*: insights into a highly versatile and diverse genus  
855 within the *Enterobacteriaceae*. FEMS microbiology reviews. 2015;39(6):968-84.
- 856 67. Koutsoudis MD, Tsaltas D, Minogue TD, von Bodman SB. Quorum-sensing regulation  
857 governs bacterial adhesion, biofilm development, and host colonization in *Pantoea stewartii*  
858 subspecies *stewartii*. Proceedings of the National Academy of Sciences of the United States of  
859 America. 2006;103(15):5983-8.
- 860 68. Geider K. Exopolysaccharides of *Erwinia amylovora*: structure, biosynthesis, regulation,  
861 role in pathogenicity of. Fire blight: the disease and its causative agent, *Erwinia amylovora*.  
862 2000:117.
- 863 69. Koczan JM, McGrath MJ, Zhao Y, Sundin GW. Contribution of *Erwinia amylovora*  
864 exopolysaccharides amylovoran and levan to biofilm formation: implications in pathogenicity.  
865 Phytopathology. 2009;99(11):1237-44.
- 866 70. Dolph PJ, Majerczak DR, Coplin DL. Characterization of a gene cluster for  
867 exopolysaccharide biosynthesis and virulence in *Erwinia stewartii*. J Bacteriol. 1988;170(2):865-  
868 71.
- 869 71. Nimtz M, Mort A, Wray V, Domke T, Zhang Y, Coplin DL, et al. Structure of stewartan,  
870 the capsular exopolysaccharide from the corn pathogen *Erwinia stewartii*. Carbohydr Res.  
871 1996;288:189-201.
- 872 72. Wang X, Yang F, von Bodman SB. The genetic and structural basis of two distinct  
873 terminal side branch residues in stewartan and amylovoran exopolysaccharides and their  
874 potential role in host adaptation. Molecular microbiology. 2012;83(1):195-207.



- 875 73. Bernhard F, Schullerus D, Bellemann P, Nimtz M, Coplin DL, Geider K. Genetic transfer  
876 of amylovoran and stewartan synthesis between *Erwinia amylovora* and *Erwinia stewartii*.  
877 Microbiology (Reading, England). 1996;142 ( Pt 5):1087-96.
- 878 74. Raetz CRH, Whitfield C. Lipopolysaccharide Endotoxins. Annual Review of  
879 Biochemistry. 2002;71(1):635-700.
- 880 75. Knirel YA, Valvano MA. Bacterial lipopolysaccharides: structure, chemical synthesis,  
881 biogenesis and interaction with host cells: Springer Science & Business Media; 2011.
- 882 76. Bernal P, Llamas MA, Filloux A. Type VI secretion systems in plant-associated bacteria.  
883 Environmental microbiology. 2018;20(1):1-15.
- 884 77. Khan SR, Gaines J, Roop RM, Farrand SK. Broad-host-range expression vectors with  
885 tightly regulated promoters and their use to examine the influence of TraR and TraM expression  
886 on Ti plasmid quorum sensing. Applied and environmental microbiology. 2008;74(16):5053-62.
- 887 78. Hallez R, Letesson JJ, Vandenhoute J, De Bolle X. Gateway-based destination vectors for  
888 functional analyses of bacterial ORFeomes: application to the Min system in *Brucella abortus*.  
889 Applied and environmental microbiology. 2007;73(4):1375-9.
- 890 79. Larsen RA, Wilson MM, Guss AM, Metcalf WW. Genetic analysis of pigment  
891 biosynthesis in *Xanthobacter autotrophicus* Py2 using a new, highly efficient transposon  
892 mutagenesis system that is functional in a wide variety of bacteria. Archives of microbiology.  
893 2002;178(3):193-201.
- 894 80. Zhao K, Tseng BS, Beckerman B, Jin F, Gibiansky ML, Harrison JJ, et al. Psl trails guide  
895 exploration and microcolony formation in *Pseudomonas aeruginosa* biofilms. Nature.  
896 2013;497:388.
- 897

## 898 **Supporting Information Captions**

899 Figure S1. Clustal Omega multiple sequence alignment of *Pantoea* sp. YR343 DGC2884,  
900 *Pseudomonas aeruginosa* PA01 TpbB, and *Escherichia coli* MG1655 DgcN (36).

901 Figure S2. Growth curves of wild type (pSRK-Km) and the indicated DGC overexpressing strains  
902 in minimal media (A) and LB media (B). Error bars represent the standard deviation from three  
903 independent cultures.

904 Figure S3. Expression of individual diguanylate cyclases using RT-PCR. Image shown is  
905 representative of a minimum of 3 replicates.

906 Figure S4. Growth curves of wild type *Pantoea* sp. YR343 and indicated transposon mutants in  
907 minimal media (A) and in LB media (B). Error bars represent the standard deviation from three  
908 independent cultures.

909 Figure S5. Western blot showing expression of tagged full length DGC2884 and DGC2884 $\Delta$ TM.  
910 Weights of markers are indicated on the left and arrows point to bands that represent the indicated  
911 protein.

912

913

914

**Biofilm (vinyl)**

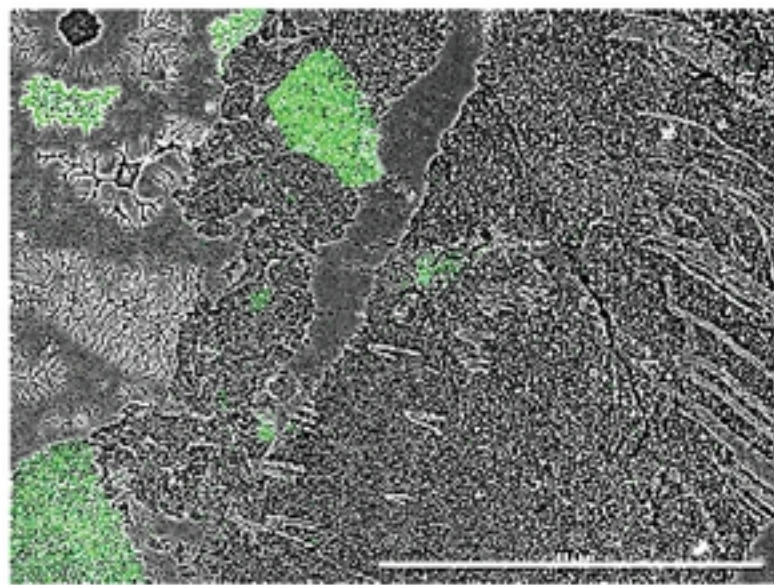

**YR343  
(pPROBE-  
DGC2884  
promoter)**

**Root colonization  
(*Triticum aestivum*)**

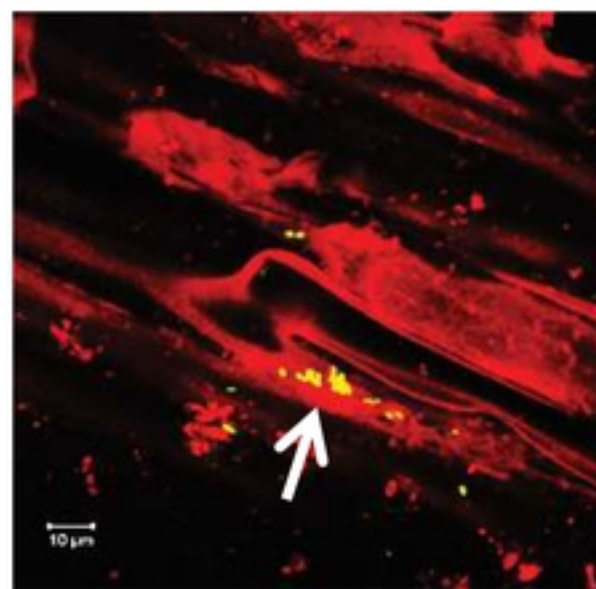

**Root colonization  
(*Populus trichocarpa*)**

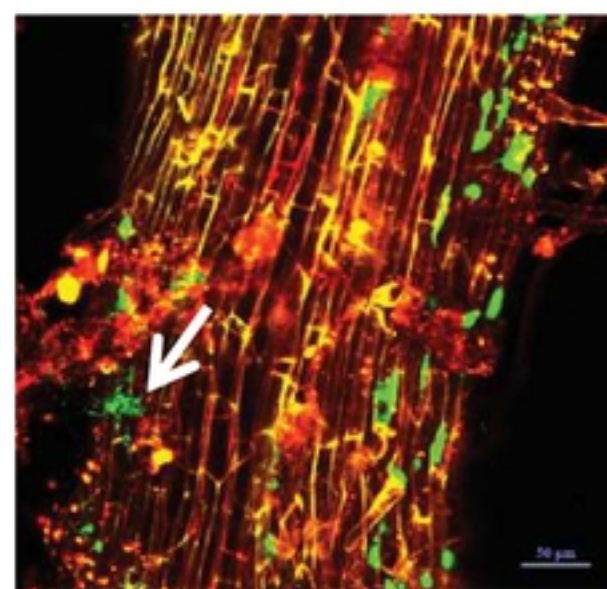

Figure 1

**A**

|  |           |             |            |              |
|--|-----------|-------------|------------|--------------|
|  | YR343     | YR343       | YR343      | YR343        |
|  | (pSRK-Km) | (pSRK-2884) | (pSRK-2884 | (pSRK-2884   |
|  |           |             | AADEF)     | $\Delta$ TM) |

**B**  
Motility

**C**

**D**

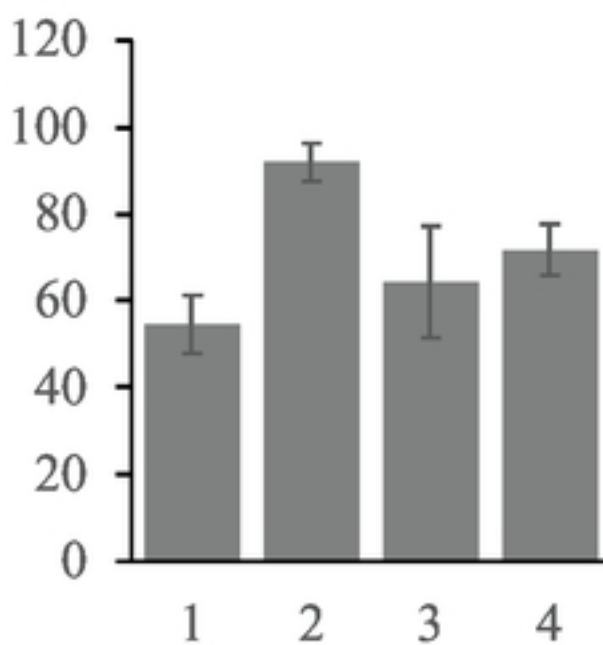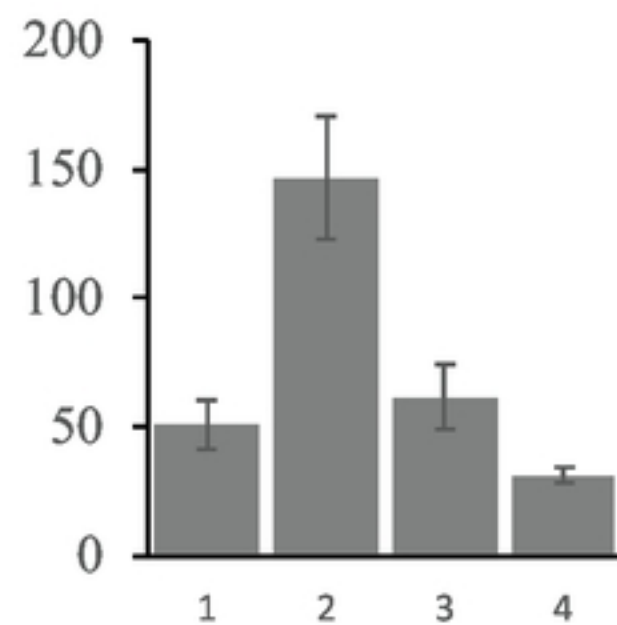

Figure 2

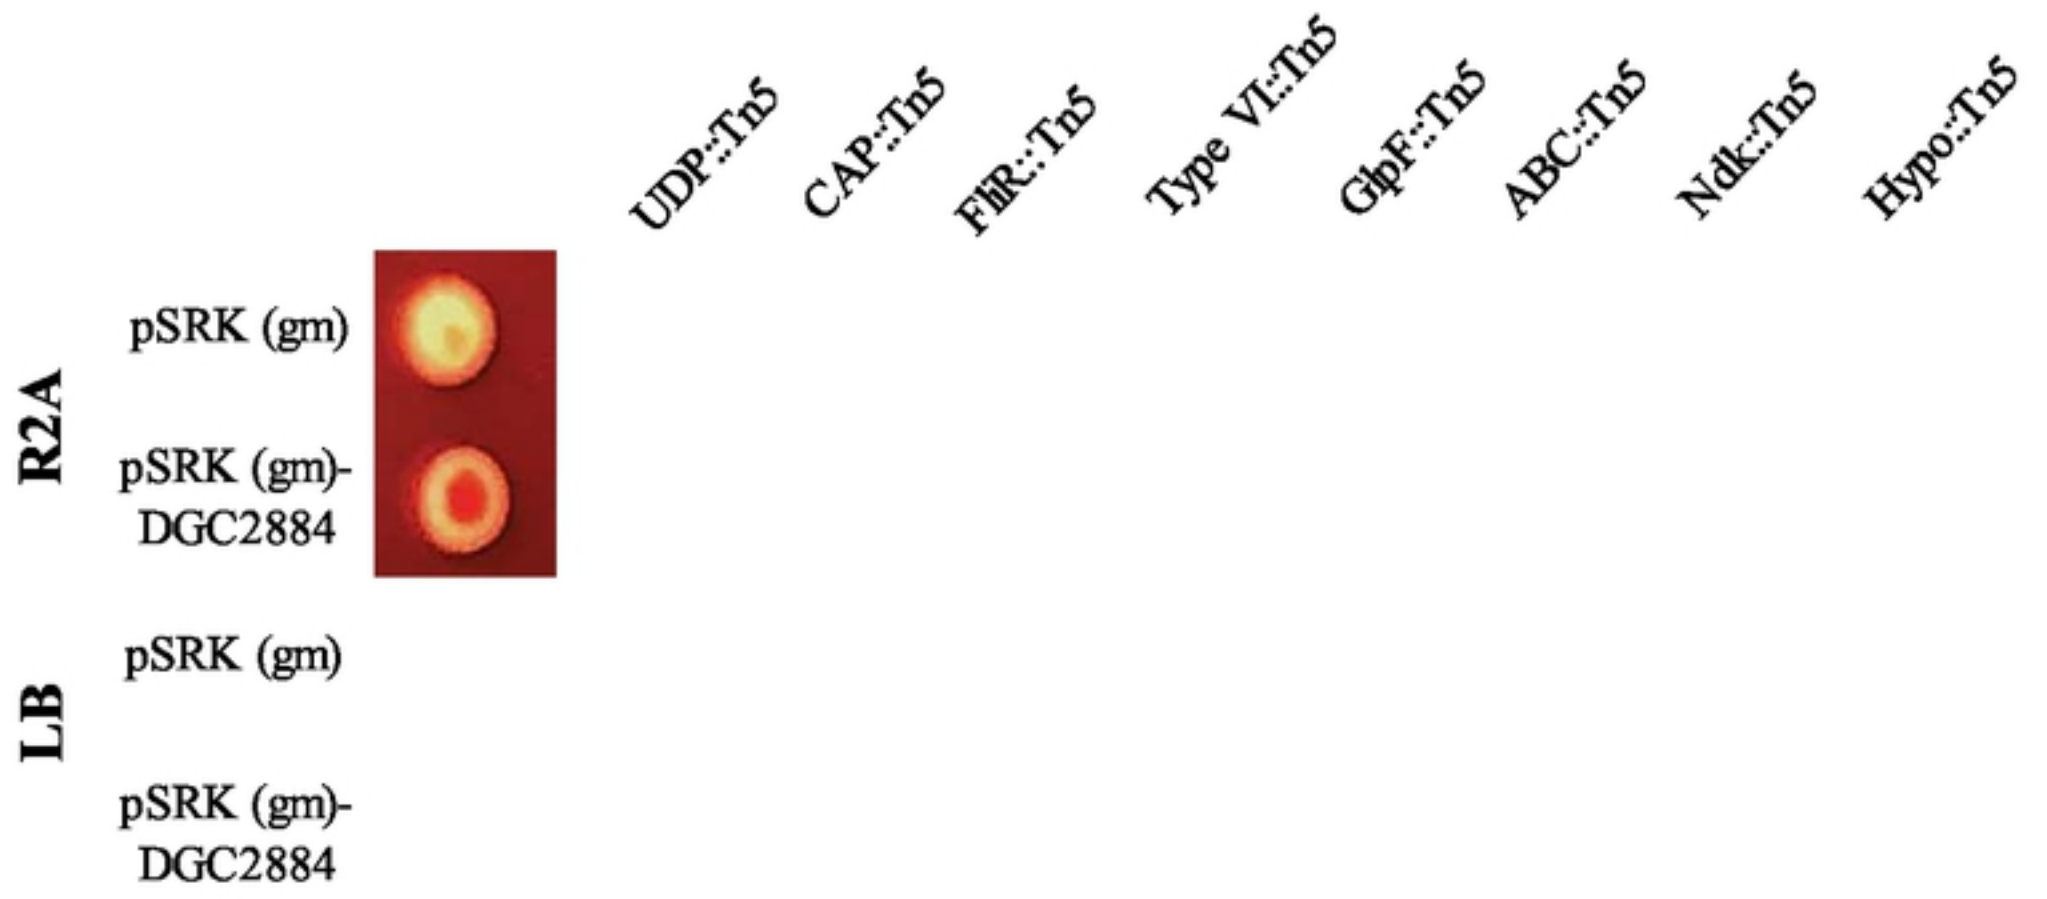

bioRxiv preprint doi: <https://doi.org/10.1101/2021.03.03.433726>; this version posted March 3, 2021. The copyright holder for this preprint (which was not certified by peer review) is the author/funder, who has granted bioRxiv a license to display the preprint in perpetuity. It is made available under aCC-BY 4.0 International license.

# Root colonization assay

**A**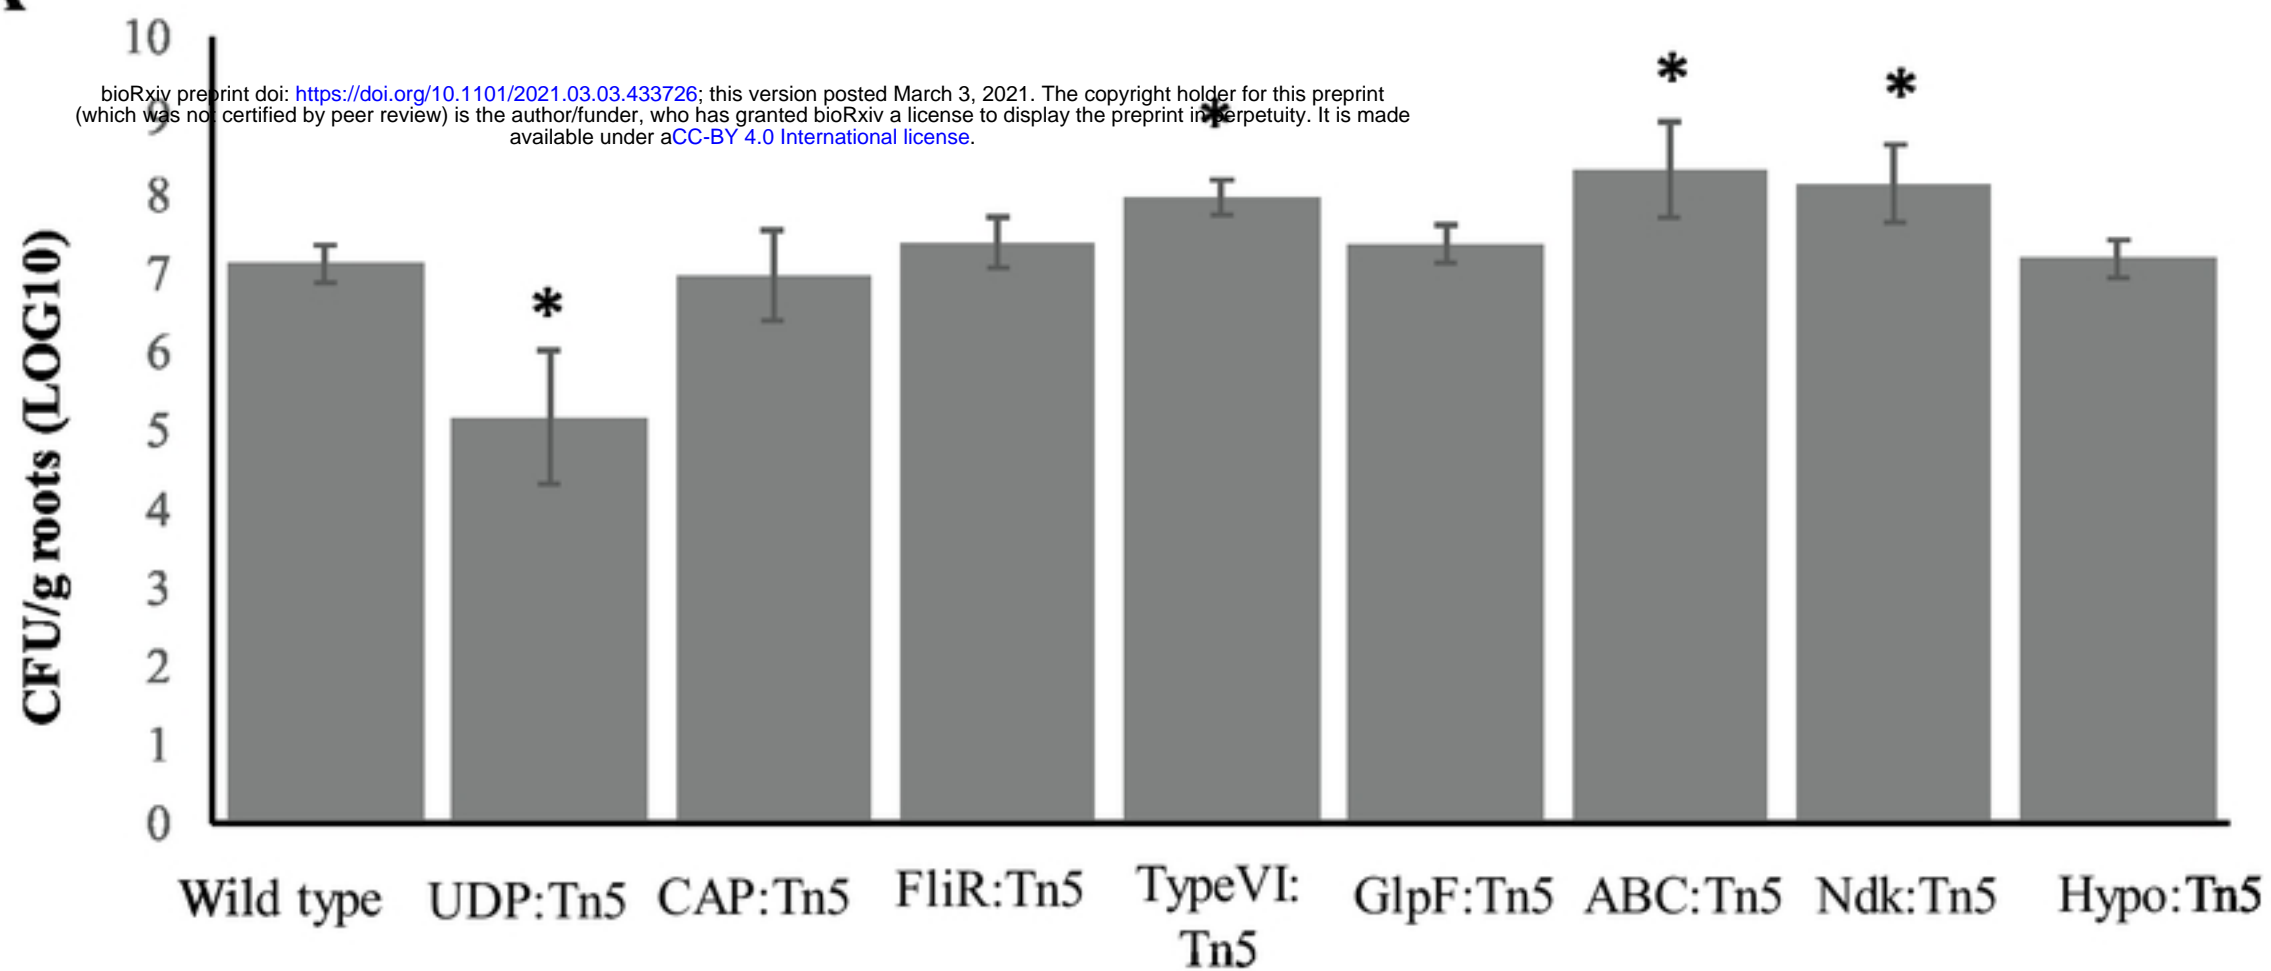**B**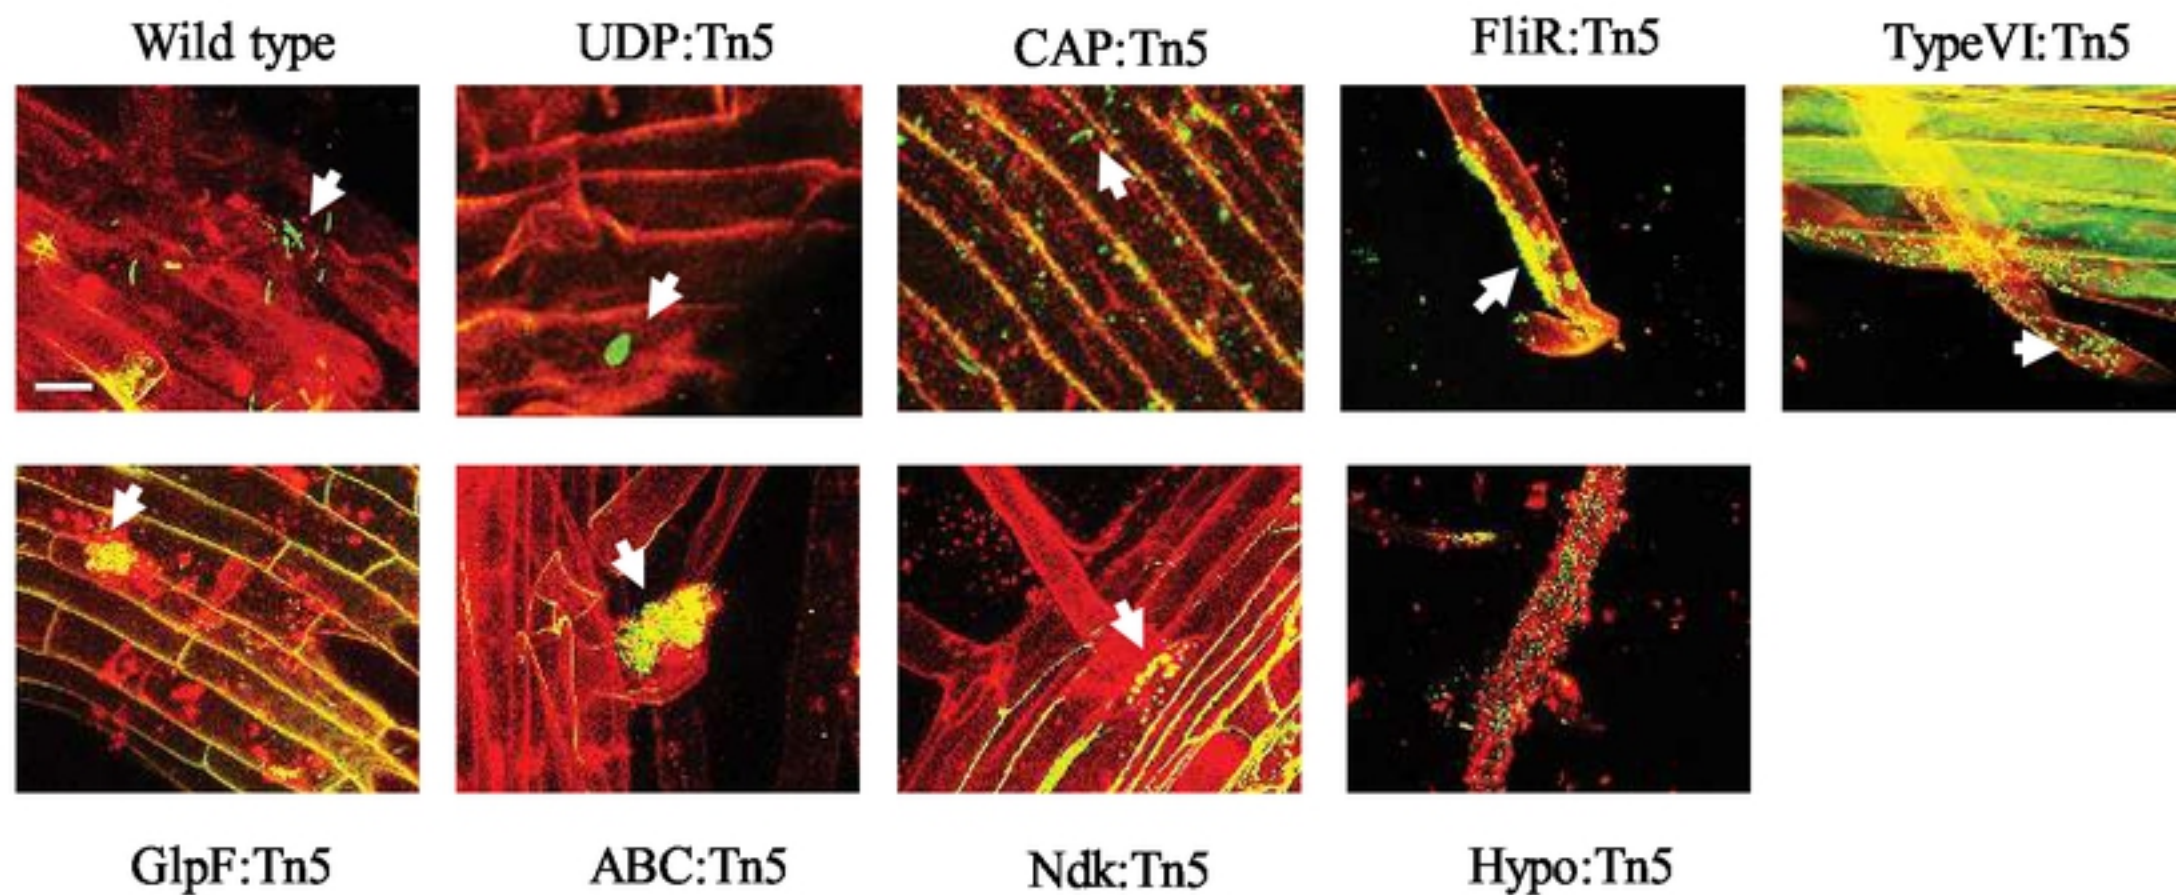

Figure 5

**A**

PMI39\_02884

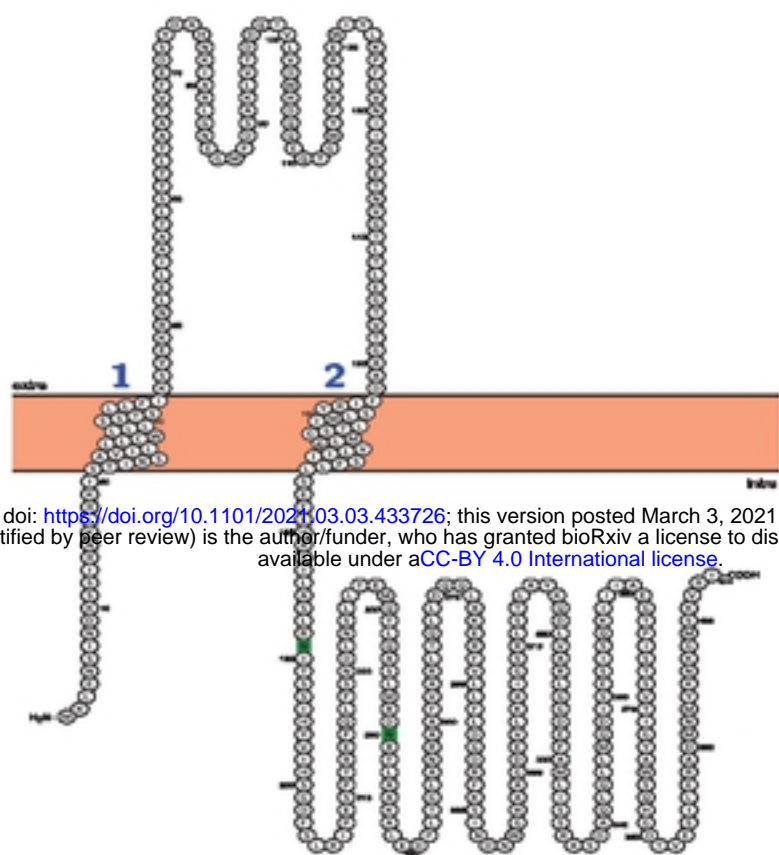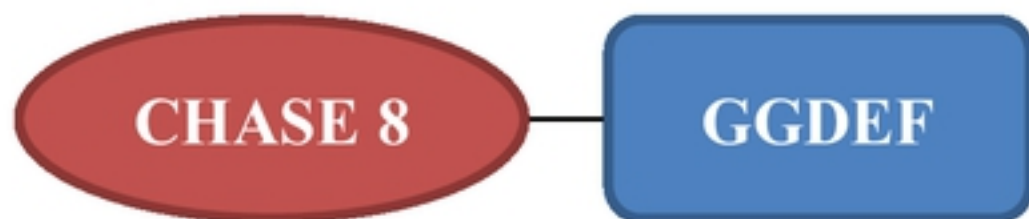**B**

$\alpha$ -HA  
YR343 (pRH016-*DGC2884*)

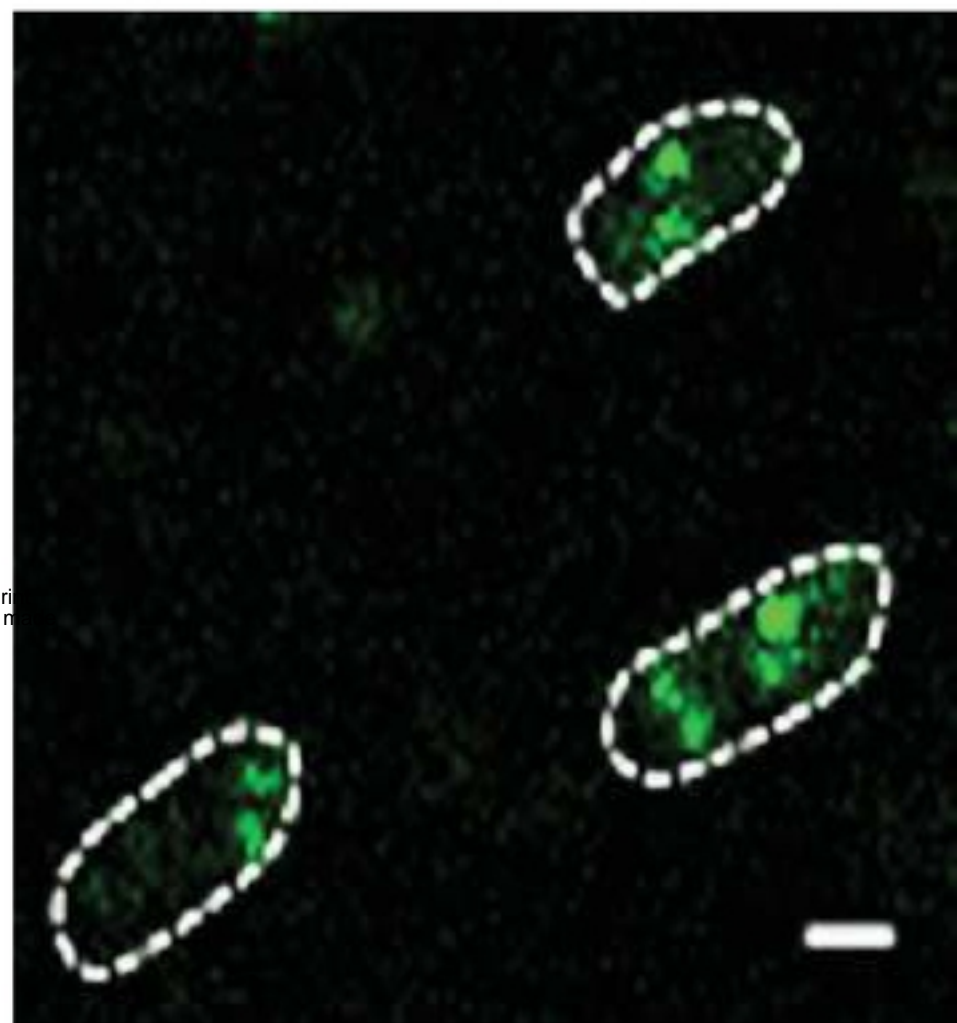

$\alpha$ -Myc  
YR343 (pRH016-*DGC2884* $\Delta$ TM)

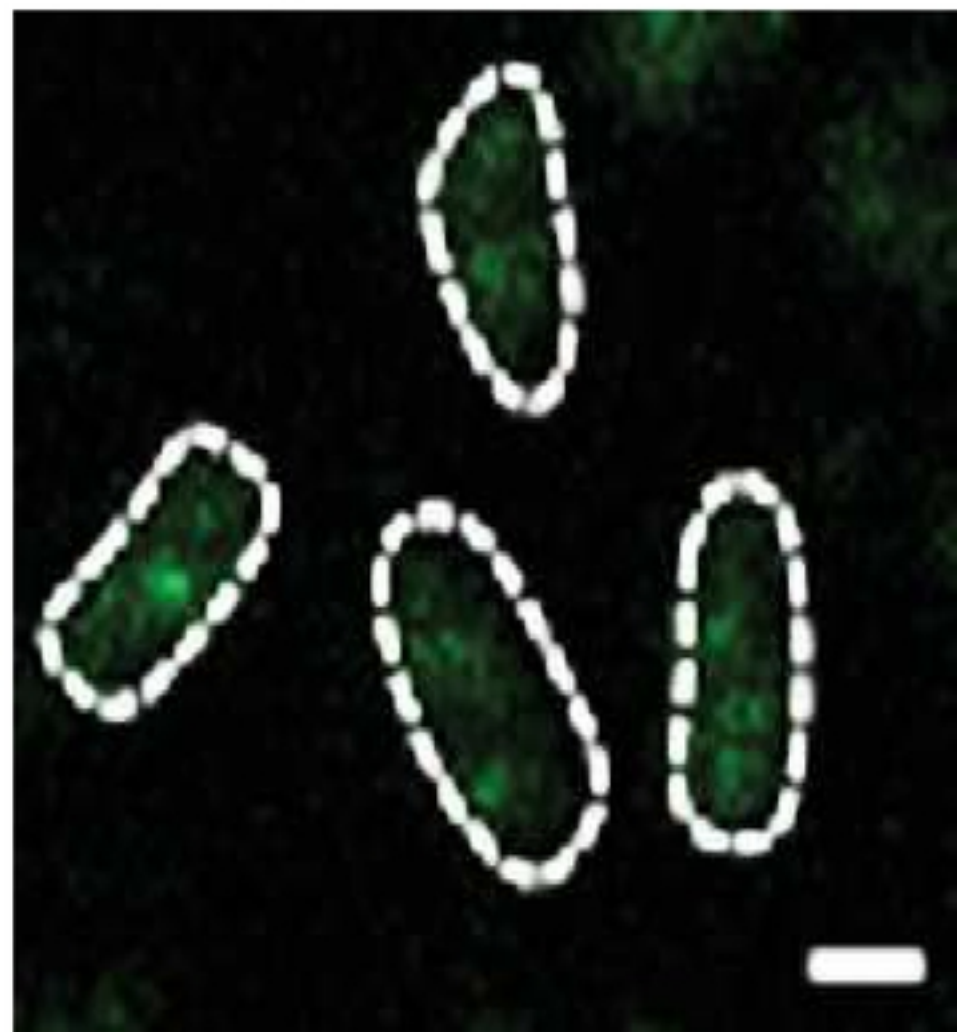**C**

Motility

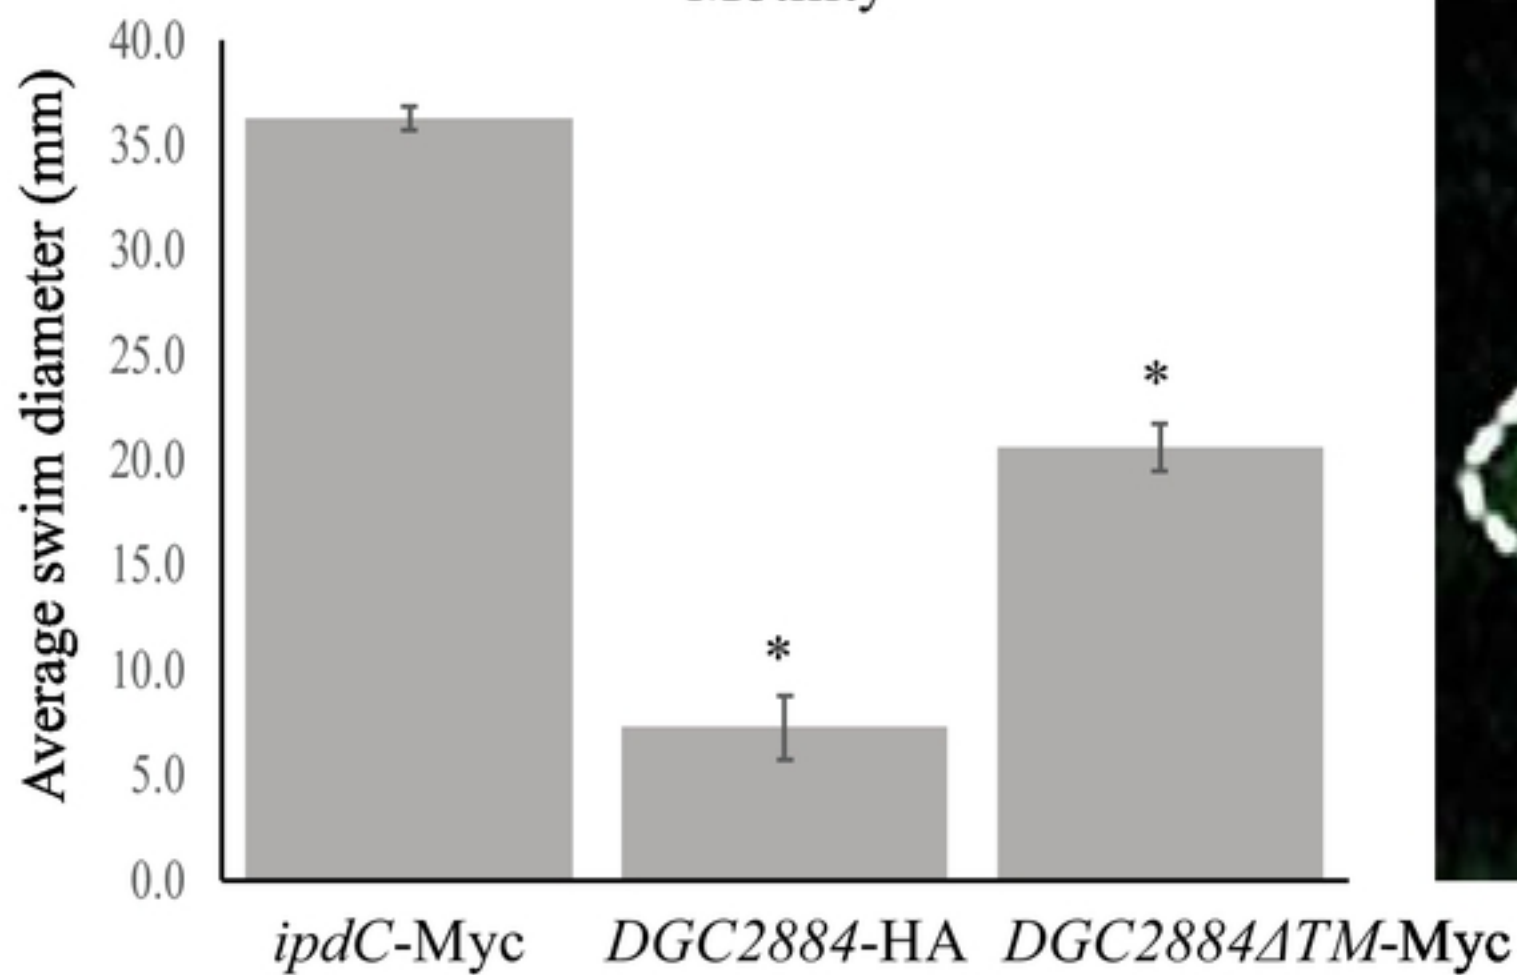

Figure 3 revised
